# Supplementary material for: Functional group tuning of CAU-10(Al) for efficient C2H2 storage and C2H2/CO2 separation
Source: Royal Society of Chemistry journal article supplement (doi:10.1039/d4ta02821j), 2024-01-01
Supplement: d4ta02821j1.pdf [file d4ta02821j1.pdf]

## Supplementary Information

### Functional group tuning of CAU-10(Al) for efficient C<sub>2</sub>H<sub>2</sub> storage and C<sub>2</sub>H<sub>2</sub>/CO<sub>2</sub> separation

Eun Woo Lee<sup>†a</sup>, Balkaran Singh Sran<sup>†a</sup>, Ayoub Daouli<sup>†c</sup>, Maftun Salimov<sup>ab</sup>, Ji Woong Yoon<sup>a</sup>,  
Kyung Ho Cho<sup>ab</sup>, Donghui Jo<sup>a</sup>, Guillaume Maurin<sup>\*c</sup>, Su-Kyung Lee<sup>\*ab</sup>, U-Hwang Lee<sup>\*ab</sup>

*a. Research Group for Nanocatalysts and Center for Convergent Chemical Process (CCP), Korea  
Research Institute of Chemical Technology (KRICT), Gajeong-Ro 141, Yuseong, Daejeon 34114,  
Republic of Korea.*

*b. Department of Advanced Materials and Chemical Engineering, University of Science and  
Technology (UST), Daejeon 34113, Republic of Korea*

*c. ICGM, University Montpellier, CNRS, ENSCM, Montpellier, France*

E-mail: guillaume.maurin1@umontpellier.fr (G. Maurin), sukyung@kRICT.re.kr (S.-K. Lee),  
uhwang@kRICT.re.kr (U.-H. Lee)

† These authors contributed equally to this work.

## IR Spectroscopy :

| Vibration (type)*                                | Literature | CAU-10-H | CAU-10-OH | CAU-10-F | CAU-10-NO <sub>2</sub> | CAU-10-NH <sub>2</sub> | CAU-10-CH <sub>3</sub> |
|--------------------------------------------------|------------|----------|-----------|----------|------------------------|------------------------|------------------------|
| $\nu_s(\mu\text{-OH})$                           | 3600-3650  | 3616     | 3610      | 3621     | 3644                   | 3610                   | 3612                   |
| $\nu_s(\text{CH})_{\text{methyl}}$               | 2930       | -        | -         | -        | -                      | -                      | 2928                   |
| $\nu_s(\text{CH})_{\text{ring}}$                 | 3000-3100  | 3078     | 3080      | 3085     | 3080                   | 3073                   | 3082                   |
| $\nu_s(\text{CH})_{\text{out of plain bending}}$ | 720        | -        | -         | -        | -                      | -                      | 729                    |
| <b>N-H wagging band</b>                          | 764        | -        | -         | -        | -                      | 781                    | -                      |
| <b>symmetric stretching NH<sub>2</sub></b>       | 3448       | -        | -         | -        | -                      | Merged with OH peak    | -                      |
| <b>asymmetric stretching NH<sub>2</sub></b>      | 3368       | -        | -         | -        | -                      | Merged with OH peak    | -                      |
| $\nu_s(\text{COO})$                              | 1550-1580  | 1554     | 1568      | 1578     | 1547                   | 1563                   | 1568                   |
| $[\nu_{\text{as}}(\text{COO})]$                  | 1390-1450  | 1400     | 1415      | 1401     | 1400                   | 1405                   | 1401                   |
| <b>C-O stretching</b>                            | 1120       | 1097     | 1129      | 1115     | 1097                   | 1108                   | 1114                   |
| $[\nu_s(\text{CF})]$                             | 1240       | -        | -         | 1272     | -                      | -                      | -                      |
| $\nu_{\text{as}}(\text{NO})$                     | 1547       | -        | -         | -        | 1547                   | -                      | -                      |
| $\nu_s(\text{NO})$                               | 1340-1360  | -        | -         | -        | 1350                   | -                      | -                      |
| $\nu_s(\text{OH})_{\text{water}}$                | 3300-3500  | 3414     | 3419      | 3416     | 3410                   | 3380                   | 3390                   |

**Table S1.** IR spectroscopy analysis of CAU-10-X

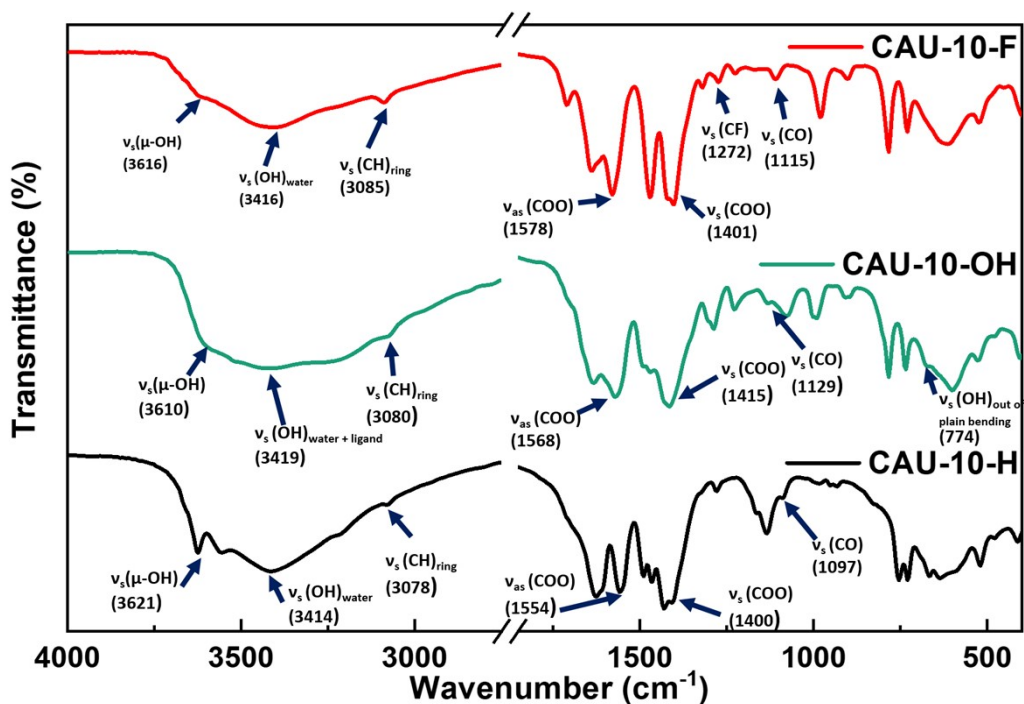

Fig. S1 FT-IR spectra of CAU-10-H (black), CAU-10-OH (green) and CAU-10-F (red).

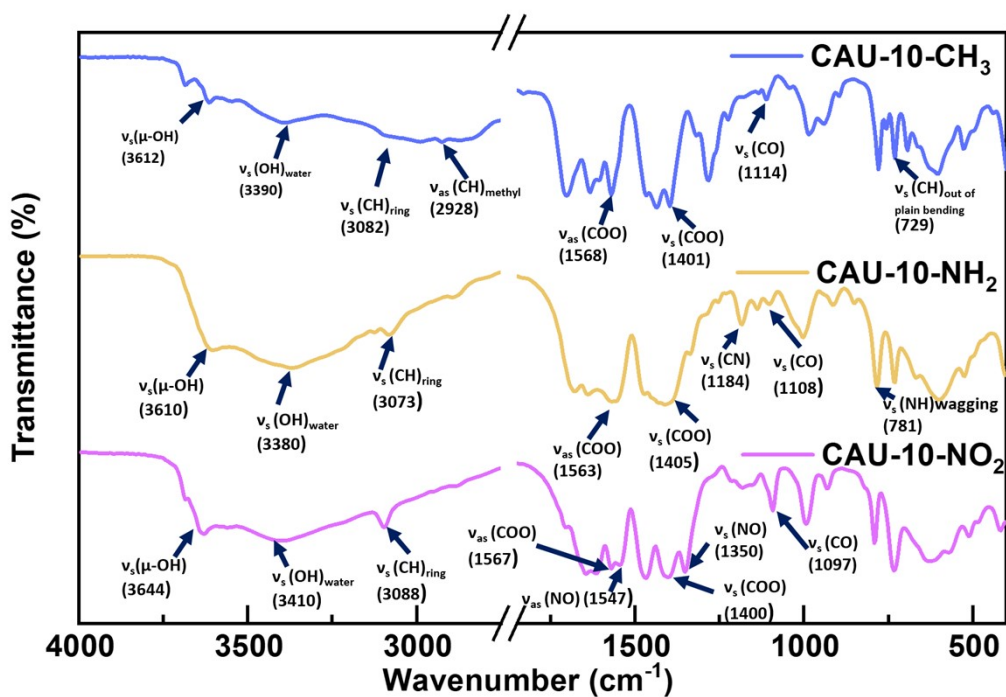

Fig. S2 FT-IR spectra of CAU-10-NO<sub>2</sub> (purple), CAU-10-NH<sub>2</sub> (yellow) and CAU-10-CH<sub>3</sub> (blue).

## Thermogravimetric analysis (TGA):

**Table S2.** TGA analysis of CAU-10-X samples.

| MOF                    | Water in the sample (%) | Theoretical Amount of Ligand (%) | Experimental Amount of Ligand * | Theoretical Amount of Residue (Al <sub>2</sub> O <sub>3</sub> ) dehydrated (%) | Experimental Amount of Residue (Al <sub>2</sub> O <sub>3</sub> ) (%)* |
|------------------------|-------------------------|----------------------------------|---------------------------------|--------------------------------------------------------------------------------|-----------------------------------------------------------------------|
| CAU-10-H               | 24.51                   | 78.86                            | 76.16                           | 24.49                                                                          | 23.84                                                                 |
| CAU-10-OH              | 20.4                    | 80.37                            | 75.2                            | 22.74                                                                          | 24.8                                                                  |
| CAU-10-F               | 18.4                    | 80.54                            | 77.26                           | 22.54                                                                          | 22.74                                                                 |
| CAU-10-NO <sub>2</sub> | 15.83                   | 82.61                            | 81.47                           | 20.14                                                                          | 18.53                                                                 |
| CAU-10-NH <sub>2</sub> | 14.32                   | 80.28                            | 79.12                           | 22.84                                                                          | 20.88                                                                 |
| CAU-10-CH <sub>3</sub> | 12.2                    | 80.19                            | 76.58                           | 22.95                                                                          | 23.42                                                                 |

\*after doing water weight percentage correction

The following formula was used to include water weight correction:

$$W_c = \frac{A \times W}{100} + A$$

Where W<sub>c</sub> : % Weight of component for dehydrated sample

W : % Weight of water calculated from TGA curve

A : % Weight of component from calculated from TGA curve

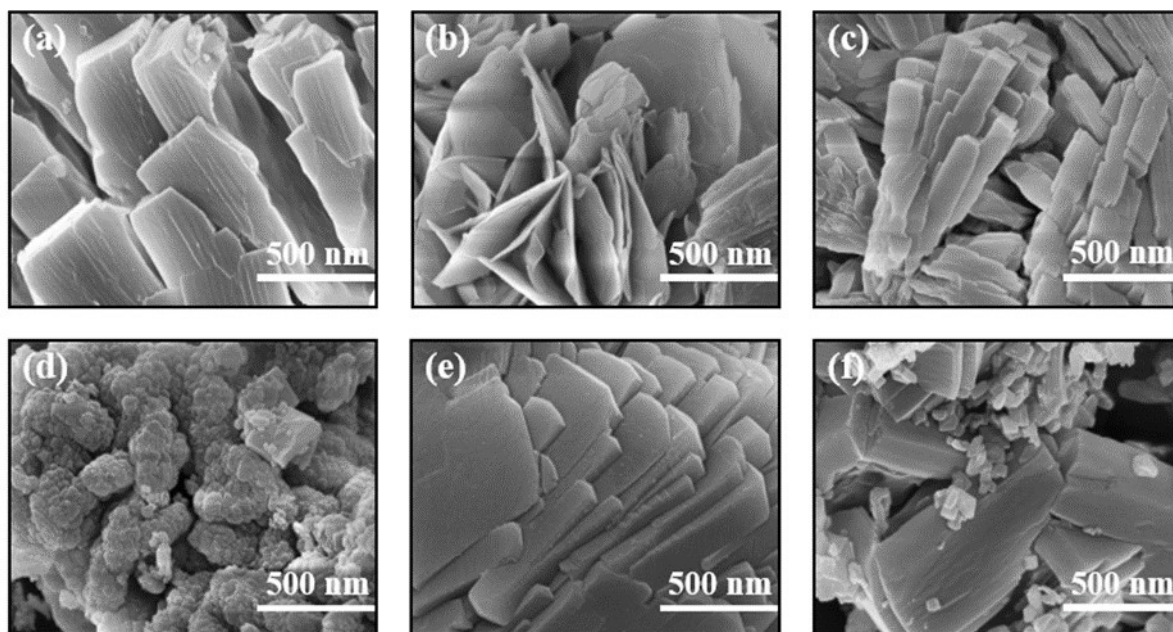

**Fig. S3** Scanning electron microscope images of (a) CAU-10-H (b) CAU-10-OH (c) CAU-10-F (d) CAU-10-NO<sub>2</sub> (e) CAU-10-NH<sub>2</sub> (f) CAU-10-CH<sub>3</sub>.

**Table S3.** Elemental analysis of CAU-10-X

| Sample                 | Element [atom %] |      |      |     |
|------------------------|------------------|------|------|-----|
|                        | C                | H    | O    | N   |
| CAU-10-H               | 46.8             | 31.6 | 21.7 | N.D |
| CAU-10-OH              | 39.8             | 32.9 | 27.1 | N.D |
| CAU-10-NO <sub>2</sub> | 40               | 25   | 30   | 5   |
| CAU-10-NH <sub>2</sub> | 38.6             | 34.3 | 22.4 | 4.7 |
| CAU-10-CH <sub>3</sub> | 45               | 36.7 | 18.6 | N.D |

N,D denotes non-detectable, and the detection limit of the sample is 0.1 wt%; CAU-10-F having fluorine is not indicated because EA is not possible

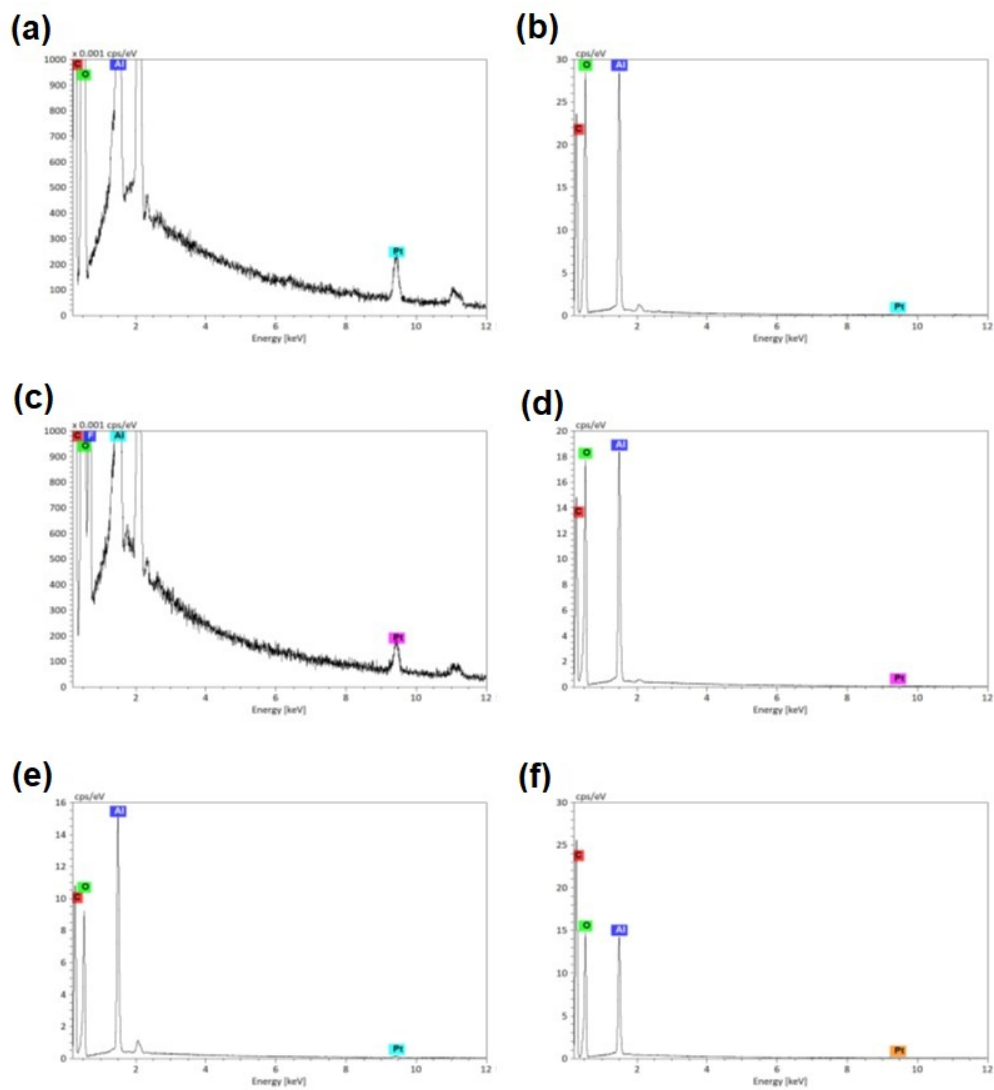

**Fig. S4** X-ray energy dispersive spectroscopy analysis of (a) CAU-10-H (b) CAU-10-OH (c) CAU-10-F (d) CAU-10-NO<sub>2</sub> (e) CAU-10-NH<sub>2</sub> (f) CAU-10-CH<sub>3</sub>.

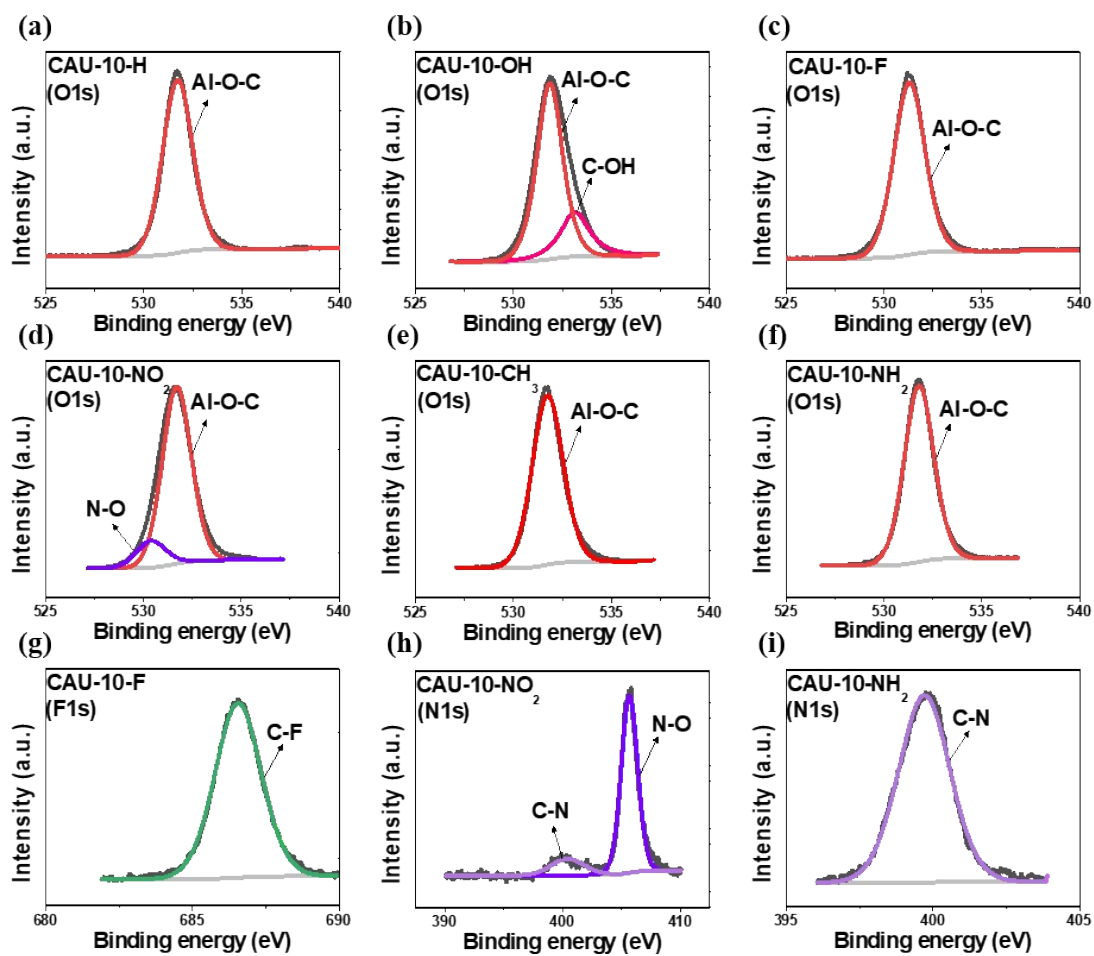

**Fig. S5** O1s X-ray photoelectron spectroscopy (XPS) spectrum of (a) CAU-10-CH<sub>3</sub>, (b) CAU-10-OH, (c) CAU-10-F, (d) CAU-10-NO<sub>2</sub>, (e) CAU-10-CH<sub>3</sub>, and (f) CAU-10-NH<sub>2</sub>. (g) F1s spectrum of CAU-10-F, and N1s spectrum of (h) CAU-10-NO<sub>2</sub>, (i) CAU-10-NH<sub>2</sub>.

**Table S4.** Summarization of binding energy of XPS

| Spectra         | Assignment        | Binding energy (eV) |               |              |                            |                            |                            |
|-----------------|-------------------|---------------------|---------------|--------------|----------------------------|----------------------------|----------------------------|
|                 |                   | CAU-10-<br>H        | CAU-10-<br>OH | CAU-10-<br>F | CAU-10-<br>NO <sub>2</sub> | CAU-10-<br>NH <sub>2</sub> | CAU-10-<br>CH <sub>3</sub> |
| C <sub>1s</sub> | C=C, C-C          | 284.4               | 284.5         | 284.4        | 284.5                      | 284.4                      | 284.4                      |
|                 | O-C=O             | 288.6               | 288.7         | 288.7        | 288.5                      | 288.5                      | 288.6                      |
|                 | C-OH              | -                   | 286.3         | -            | -                          | -                          | -                          |
|                 | C-F               | -                   | -             | 286.5        | -                          | -                          | -                          |
|                 | C-N               | -                   | -             | -            | 285.9                      | 285.7                      | -                          |
|                 | C-CH <sub>3</sub> | -                   | -             | -            | -                          | -                          | 284.9                      |
| O <sub>1s</sub> | Al-O-C            | 531.7               | 531.8         | 531.3        | 531.8                      | 531.8                      | 531.8                      |
|                 | C-OH              | -                   | 533.1         | -            | -                          | -                          | -                          |
|                 | N-O               | -                   | -             | -            | 530.4                      | -                          | -                          |
| F <sub>1s</sub> | C-F               | -                   | -             | 686.5        | -                          | -                          | -                          |
| N <sub>1s</sub> | C-N               | -                   | -             | -            | 400.1                      | 399.8                      | -                          |
|                 | N-O               | -                   | -             | -            | 405.6                      | -                          | -                          |



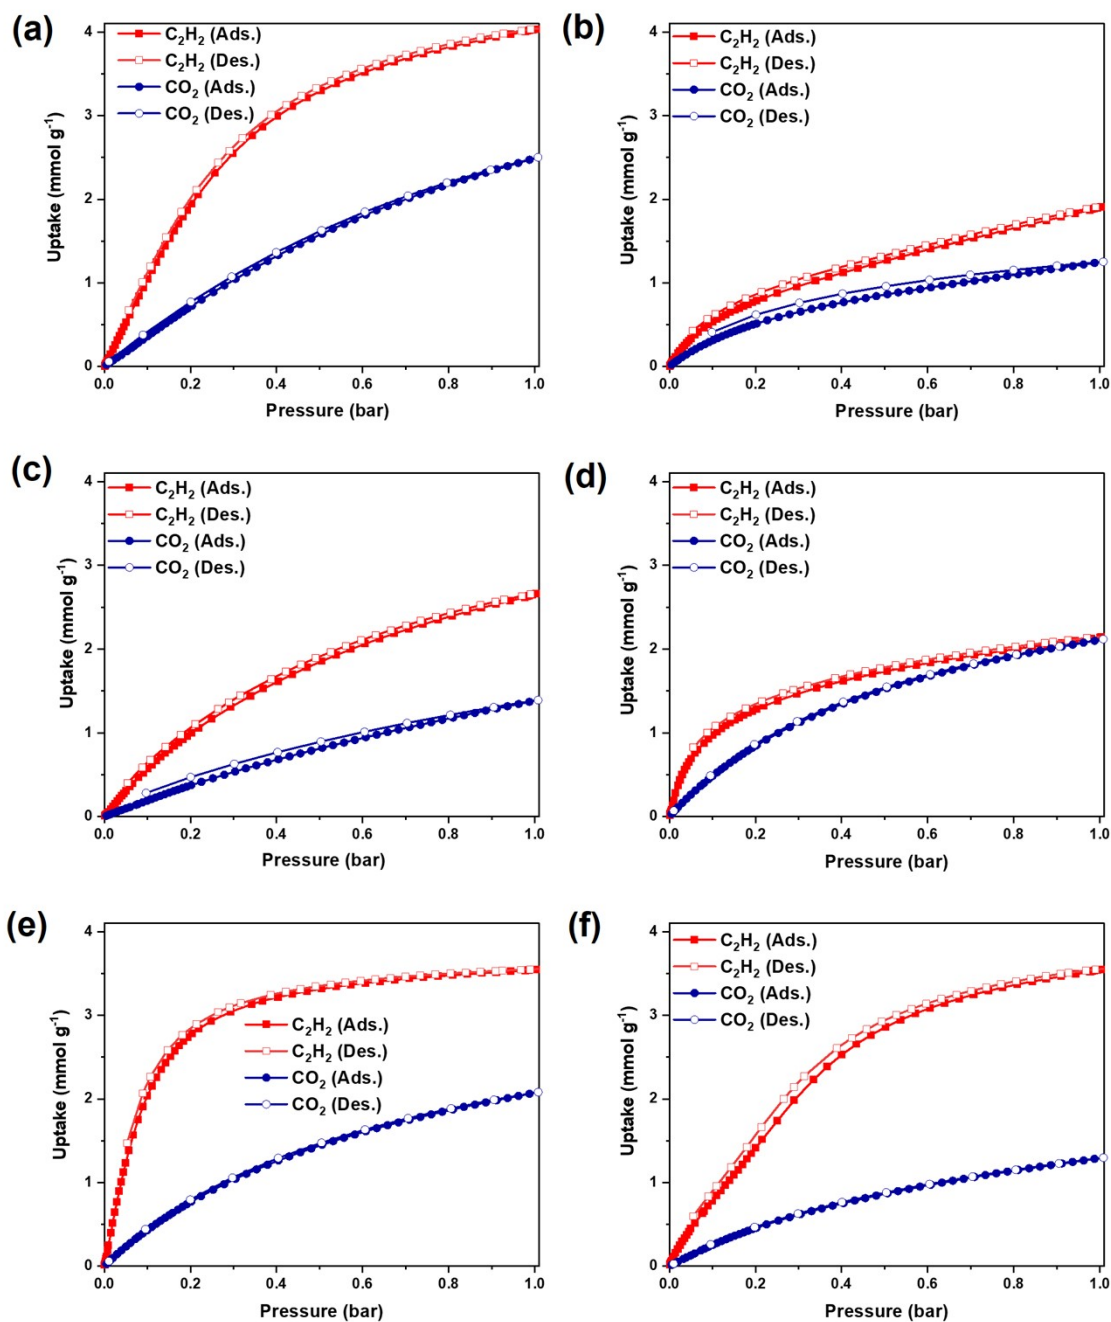

**Fig. S6**  $C_2H_2$  and  $CO_2$  single component adsorption and desorption isotherms collected at 25 °C for CAU-10-X ((a) X=H (b) X=OH (c) X=F (d) X=  $NO_2$  (e) X= $NH_2$  (f) X= $CH_3$ ). The adsorption data for  $C_2H_2$  and  $CO_2$  are shown in red square and blue circle whereas adsorption data for  $C_2H_2$  and  $CO_2$  are shown in empty red square and empty blue circle, respectively.

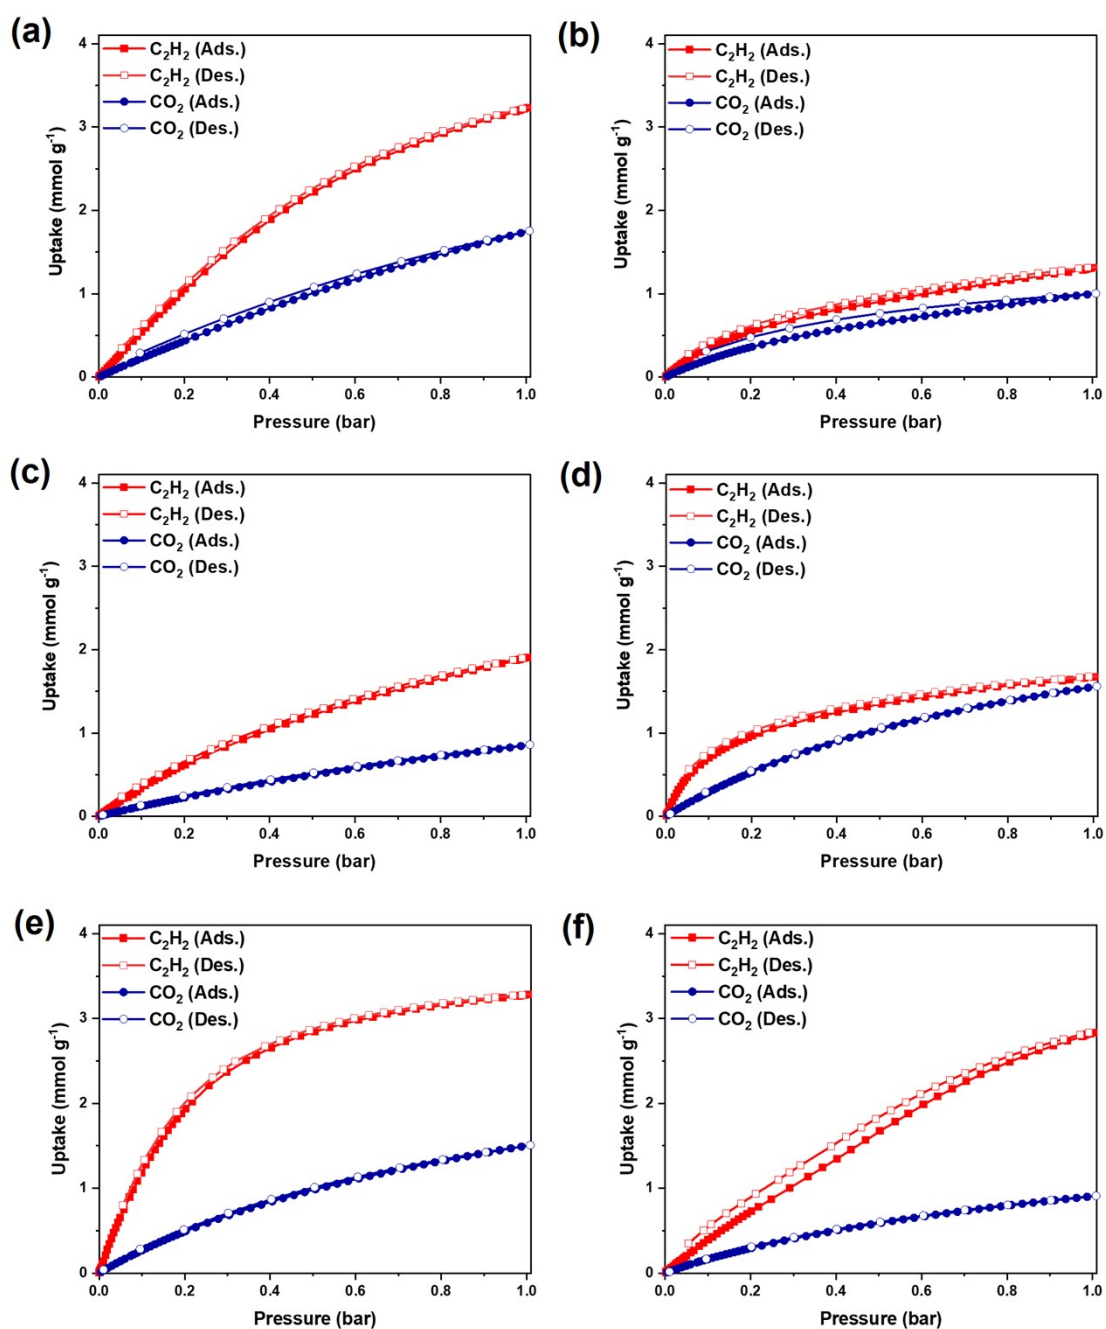

**Fig. S7**  $C_2H_2$  and  $CO_2$  single component adsorption and desorption isotherms collected at 40 °C for CAU-10-X ((a) X=H (b) X=OH (c) X=F (d) X= NO<sub>2</sub> (e) X=NH<sub>2</sub> (f) X=CH<sub>3</sub>). The adsorption data for  $C_2H_2$  and  $CO_2$  are shown in red square and blue circle whereas adsorption data for  $C_2H_2$  and  $CO_2$  are shown in empty red square and empty blue circle, respectively.

### Isosteric enthalpy of adsorption:

The  $Q_{st}$  value was calculated from the isotherm collected at two different temperatures (25 °C, and 40 °C) by Eq. (1) and (2):

$$\ln P = \ln N + \frac{1}{T} \sum_{i=0}^m a_i N^i + \sum_{i=0}^n b_i N^i \quad (1)$$

$$Q_{st} = -R \sum_{i=0}^m a_i N^i \quad (2)$$

where P is pressure (kPa), N is adsorbed quantity (mmol g<sup>-1</sup>), T is temperature (K), R is universal gas constant (8.314 J mol<sup>-1</sup> K<sup>-1</sup>), a<sub>i</sub> and b<sub>i</sub> are virial coefficients, and m and n represent the number of coefficients required to adequately fit the isotherm.

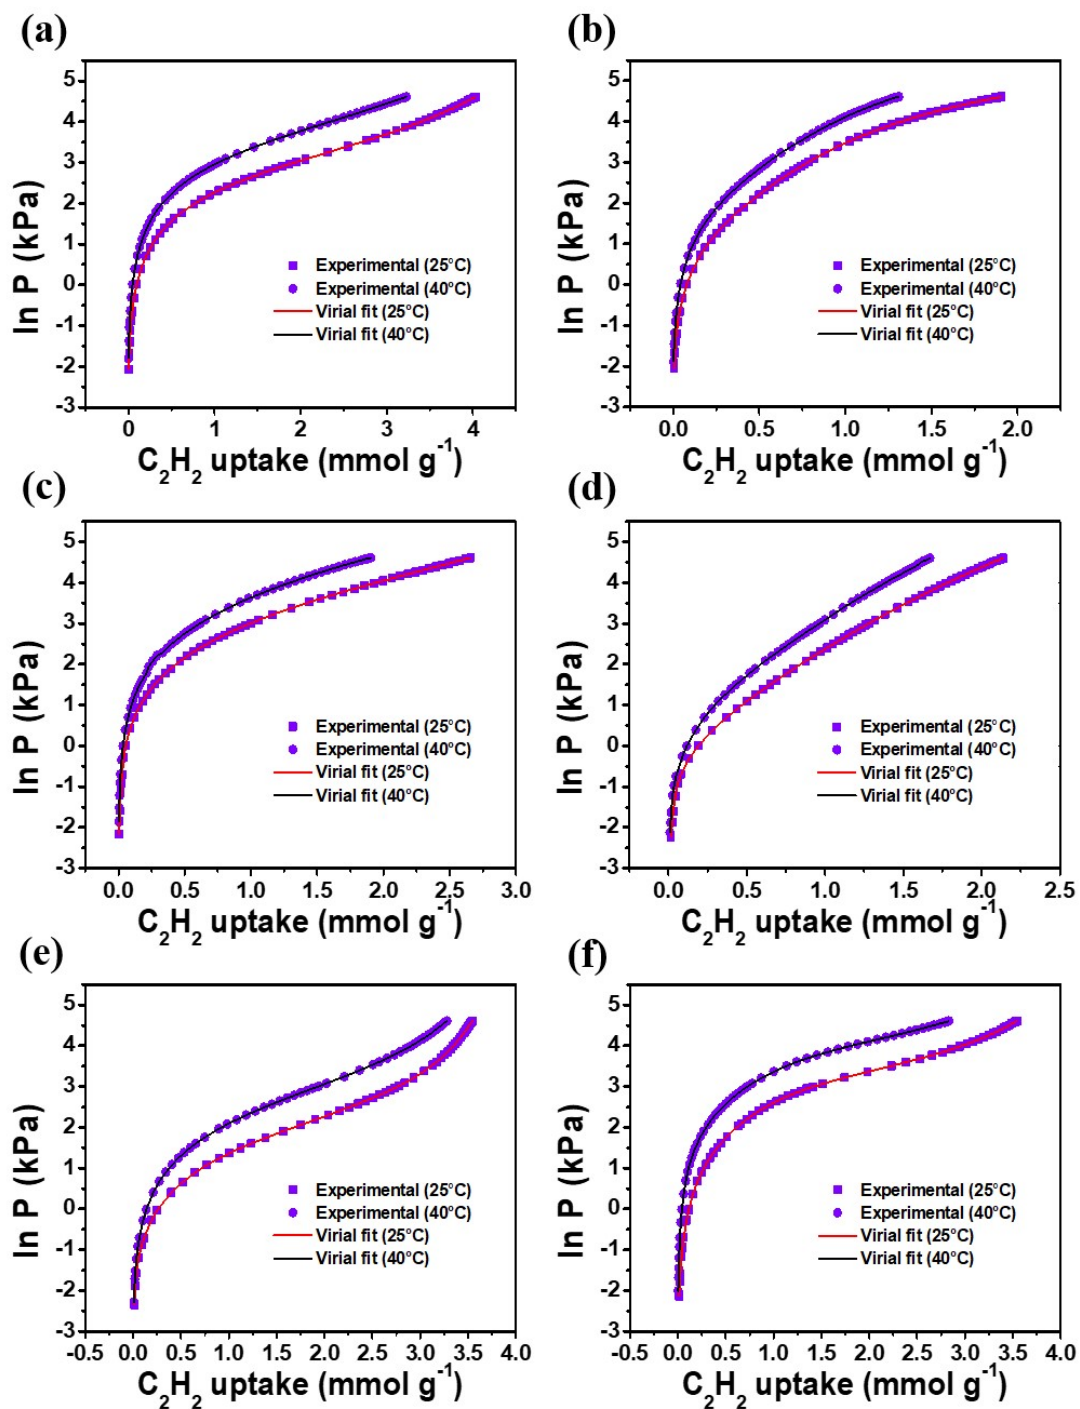

**Fig. S8** Virial analysis fit for  $C_2H_2$  adsorption isotherm of (a) CAU-10-H (b) CAU-10-OH (c) CAU-10-F (d) CAU-10- $NO_2$  (e) CAU-10- $NH_2$  (f) CAU-10- $CH_3$ .

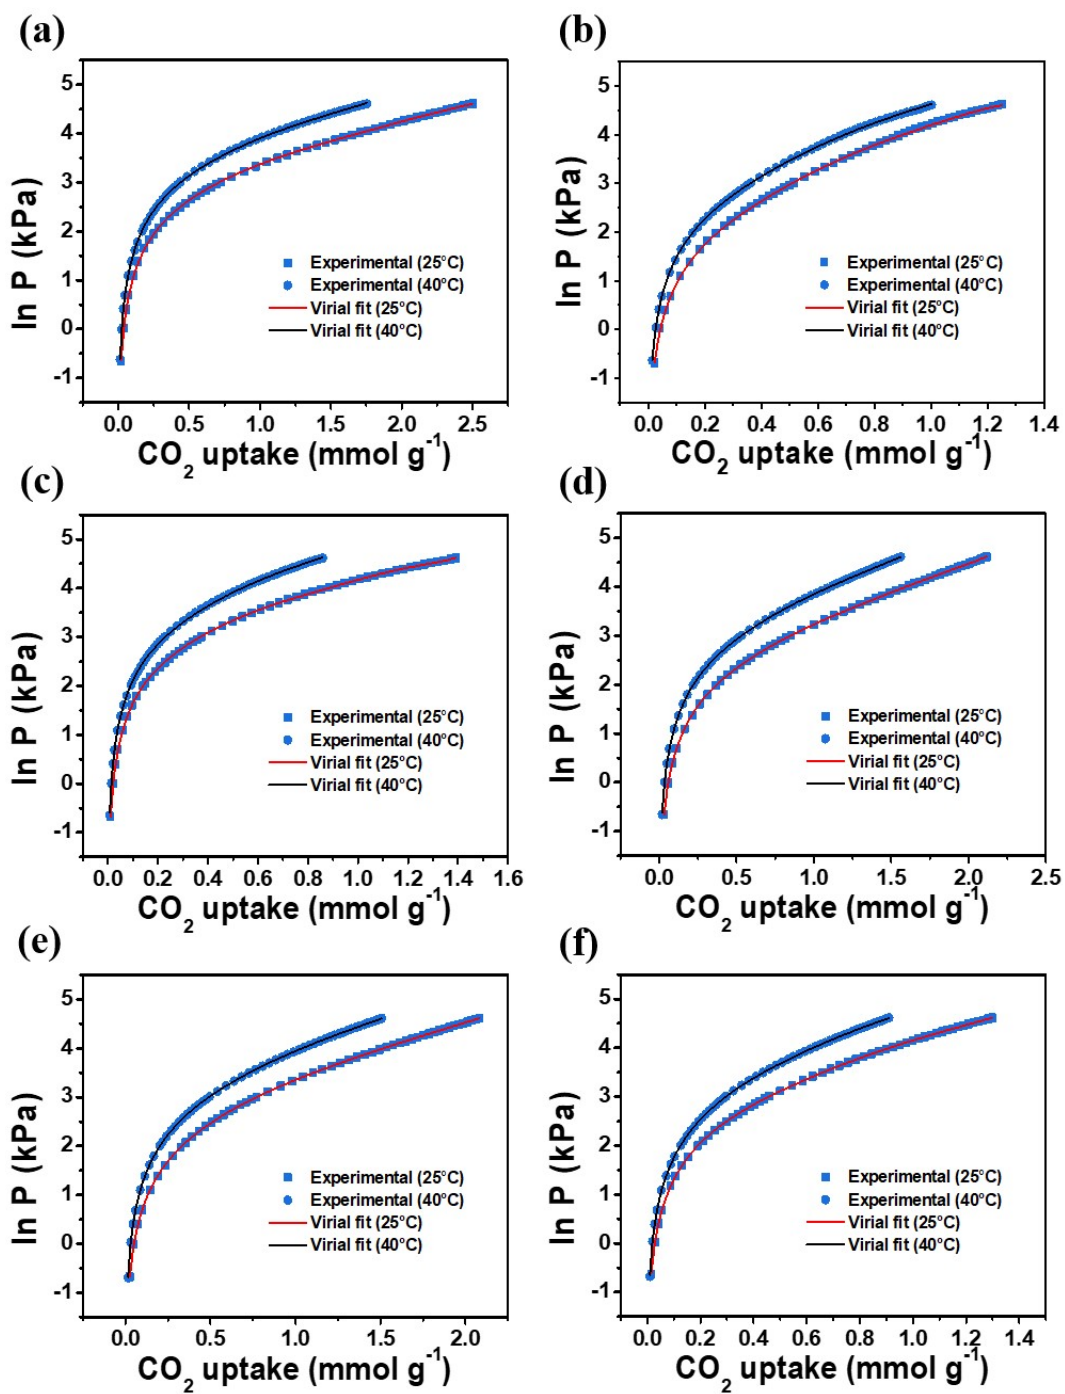

**Fig. S9** Virial analysis fit for CO<sub>2</sub> adsorption isotherm of (a) CAU-10-H (b) CAU-10-OH (c) CAU-10-F (d) CAU-10-NO<sub>2</sub> (e) CAU-10-NH<sub>2</sub> (f) CAU-10-CH<sub>3</sub>

**Table S5.** Summary of the fitted parameters of virial equation for C<sub>2</sub>H<sub>2</sub> and CO<sub>2</sub> adsorption isotherms of CAU-10-X (X=H, OH, F) at 25 °C and 40 °C

| Parameters     | CAU-10-H                      |                 | CAU-10-OH                     |                 | CAU-10-F                      |                 |
|----------------|-------------------------------|-----------------|-------------------------------|-----------------|-------------------------------|-----------------|
|                | C <sub>2</sub> H <sub>2</sub> | CO <sub>2</sub> | C <sub>2</sub> H <sub>2</sub> | CO <sub>2</sub> | C <sub>2</sub> H <sub>2</sub> | CO <sub>2</sub> |
| a0*            | -3825.5091                    | -2918.8160      | -3678.0487                    | -3466.5927      | -3343.6253                    | -2761.0144      |
| a1*            | -1446.1882                    | -202.5473       | -2715.7488                    | 1007.7891       | -959.1248                     | -1053.5855      |
| a2*            | 3021.5922                     | -826.9571       | 13712.1738                    | -1615.5956      | 1936.7541                     | -4200.4985      |
| a3*            | -3507.7955                    | 1521.5206       | -32761.6218                   | 4104.1751       | -3214.5999                    | 14129.9661      |
| a4*            | 2122.7464                     | -1440.0202      | 41769.2087                    | -4100.1559      | 2892.7098                     | -25097.2241     |
| a5*            | -691.0147                     | 736.8914        | -29074.0745                   | 632.5016        | -1431.5691                    | 24211.4364      |
| a6*            | 114.8099                      | -192.5243       | 10381.9389                    | 1348.3259       | 365.7205                      | -11950.9364     |
| a7*            | -7.6330                       | 20.1191         | -1485.9514                    | -602.6364       | -37.6005                      | 2359.7277       |
| b0*            | 15.5939                       | 13.0488         | 15.3147                       | 14.7315         | 14.1439                       | 13.0910         |
| b1*            | 0.8691                        | 1.4001          | 1.0864                        | -1.5057         | 1.5851                        | 5.7111          |
| R <sup>2</sup> | 0.9972                        | 0.9999          | 0.9985                        | 0.9999          | 0.9998                        | 0.9999          |

**Table S6.** Summary of the fitted parameters of virial equation for C<sub>2</sub>H<sub>2</sub> and CO<sub>2</sub> adsorption isotherms of CAU-10-X (X=NO<sub>2</sub>, NH<sub>2</sub>, CH<sub>3</sub>) at 25 °C and 40 °C

| Parameters     | CAU-10-NO <sub>2</sub>        |                 | CAU-10-NH <sub>2</sub>        |                 | CAU-10-CH <sub>3</sub>        |                 |
|----------------|-------------------------------|-----------------|-------------------------------|-----------------|-------------------------------|-----------------|
|                | C <sub>2</sub> H <sub>2</sub> | CO <sub>2</sub> | C <sub>2</sub> H <sub>2</sub> | CO <sub>2</sub> | C <sub>2</sub> H <sub>2</sub> | CO <sub>2</sub> |
| a0*            | -2926.1564                    | -3507.3415      | -3272.6830                    | -3277.9331      | -6110.3536                    | -2718.8771      |
| a1*            | -2785.1598                    | -81.6616        | -1939.5516                    | -258.8105       | 578.1891                      | -923.7776       |
| a2*            | 4596.5364                     | -1226.0512      | 3387.6092                     | -626.8593       | 774.2731                      | -3550.7733      |
| a3*            | -7698.2057                    | 2424.3869       | -4158.9988                    | 1226.2222       | -1026.2931                    | 11984.3001      |
| a4*            | 7586.8085                     | -2572.7971      | 2690.8314                     | -1284.0084      | 624.6120                      | -21359.9167     |
| a5*            | -4283.1972                    | 1518.3711       | -940.7007                     | 749.4177        | -195.5274                     | 20826.1608      |
| a6*            | 1276.5165                     | -466.3159       | 167.9460                      | -228.3300       | 30.4581                       | -10457.6838     |
| a7*            | -155.4574                     | 58.0318         | -11.9373                      | 28.3008         | -1.8396                       | 2111.7774       |
| b0*            | 11.8150                       | 14.5365         | 12.8573                       | 13.9329         | 22.7141                       | 12.5976         |
| b1*            | 5.2846                        | 1.6200          | 2.2577                        | 1.7364          | -2.2758                       | 5.2636          |
| R <sup>2</sup> | 0.9998                        | 1.0000          | 0.9992                        | 1.0000          | 0.9992                        | 1.0000          |

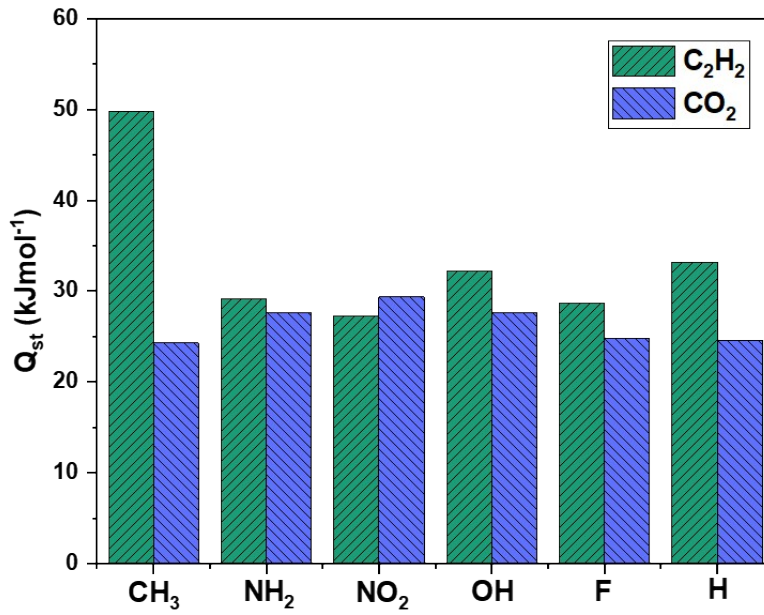

**Fig. S10** Comparison of the  $Q_{st}$  at zero-coverage for  $C_2H_2$  and  $CO_2$  on functional group on CAU-10(Al)

### Prediction of IAST selectivity

Myers and Prausnitz developed the ideal adsorbed solution theory (IAST) to predict the adsorption equilibria in multi-component gas mixture adsorption. The adsorption parameters calculated using the DSLF equation were used for the calculation of the IAST selectivity, as expressed in Eq. (S):

$$S = \frac{X_1}{X_2} \times \frac{Y_2}{Y_1}$$

where  $X_1$  and  $X_2$  are the mole fractions of the adsorbed  $C_2H_2$  and  $CO_2$ , respectively, while  $Y_1$  and  $Y_2$  are the partial pressures of the  $C_2H_2$  and  $CO_2$  gas mixture.

### Fitting of model equation of single component isotherms

The single-component  $C_2H_2$  and  $CO_2$  adsorption isotherms of CAU-10-X (X=H, OH, F,  $NO_2$ ,  $NH_2$ ,  $CH_3$ ) were fitted using the dual-site Langmuir Freundlich (DSFL) model to obtain the best fitting result by IAST++ software. The fit graphs provided by software are given in Fig. S4& S5. The isotherm parameter obtained from fitting is presented in Table S4.

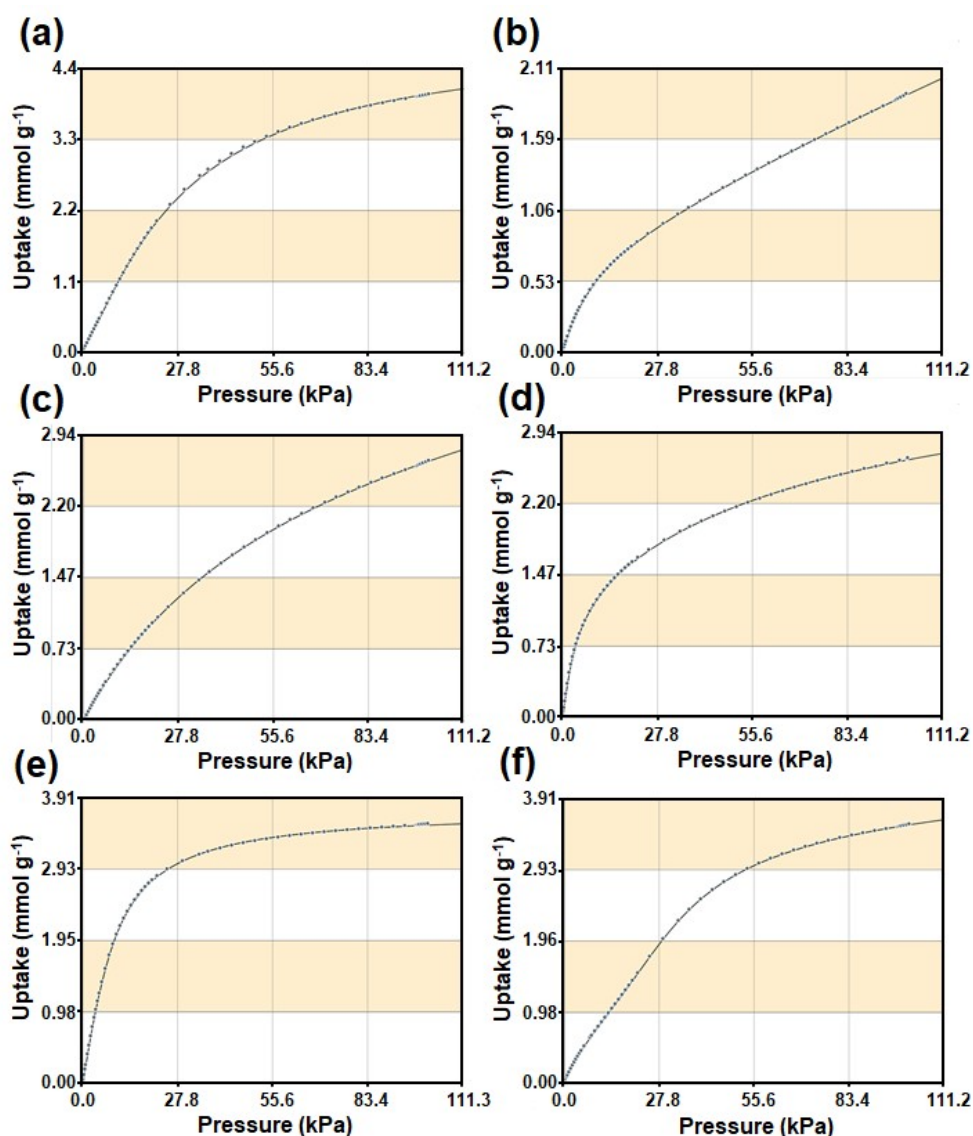

**Fig. S11** Results for the fitting of experimental  $C_2H_2$  isotherm curves obtained at  $25^\circ C$  for CAU-10-X with Dual-site Langmuir Freundlich model where grey dot is experimental data and black line is fitting for DSLF model (a) CAU-10-H (b) CAU-10-OH (c) CAU-10-F (d) CAU-10- $NO_2$  (e) CAU-10- $NH_2$  (f) CAU-10- $CH_3$ .



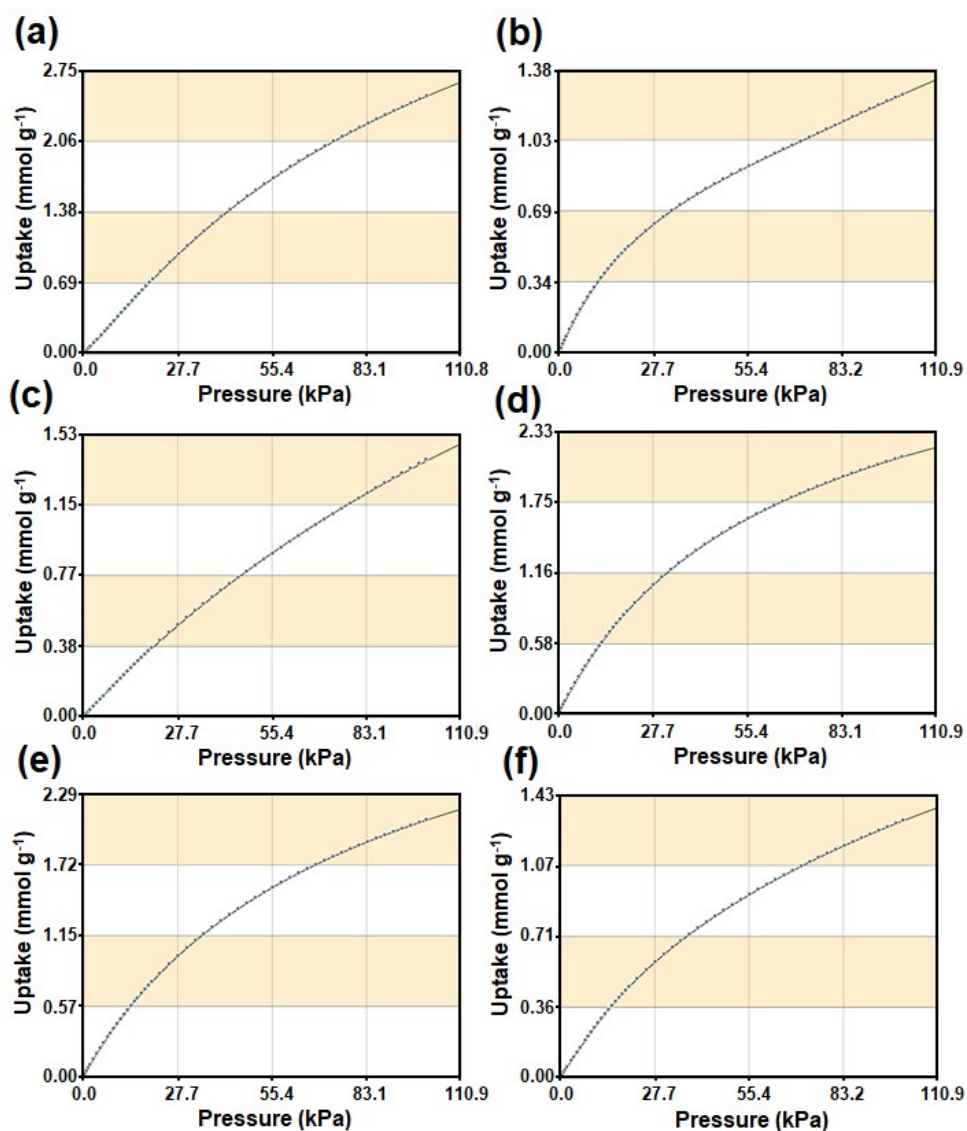

**Fig. S12** Results for the fitting of experimental CO<sub>2</sub> isotherm curves obtained at 25°C for CAU-10-X with Dual-site Langmuir Freundlich model where grey dot is experimental data and black line is fitting for DSLF model (a) CAU-10-H (b) CAU-10-OH (c) CAU-10-F (d) CAU-10-NO<sub>2</sub> (e) CAU-10-NH<sub>2</sub> (f) CAU-10-CH<sub>3</sub>.

**Table S7.** Dual-site Langmuir fit parameter for CAU-10-X at 25 °C

| Sample                 | Dual-site Langmuir Freundlich Model |                            |                           |                |                            |                           |                |                |
|------------------------|-------------------------------------|----------------------------|---------------------------|----------------|----------------------------|---------------------------|----------------|----------------|
|                        | Gas                                 | q <sub>1</sub><br>(mmol/g) | k <sub>1</sub><br>(1/kPa) | n <sub>1</sub> | q <sub>2</sub><br>(mmol/g) | k <sub>2</sub><br>(1/kPa) | n <sub>2</sub> | R <sup>2</sup> |
| CAU-10-H               | C <sub>2</sub> H <sub>2</sub>       | 4.5150                     | 3.64E <sup>-2</sup>       | 1.3756         | 0.1568                     | 0.5677                    | 1.3434         | 0.9999         |
|                        | CO <sub>2</sub>                     | 1.4918                     | 0.0188                    | 1.3996         | 6.6029                     | 0.0024                    | 0.8897         | 0.9999         |
| CAU-10-OH              | C <sub>2</sub> H <sub>2</sub>       | 9.4136                     | 0.0017                    | 1.1198         | 0.7779                     | 0.1211                    | 1.0982         | 0.9999         |
|                        | CO <sub>2</sub>                     | 1.5546                     | 0.2367                    | 0.9603         | 0.5165                     | 0.0082                    | 3.7444         | 0.9999         |
| CAU-10-F               | C <sub>2</sub> H <sub>2</sub>       | 4.6789                     | 0.0130                    | 0.9797         | 5.92E <sup>-18</sup>       | 5.5595                    | 1.3887         | 0.9999         |
|                        | CO <sub>2</sub>                     | 4.5358                     | 0.0043                    | 0.9910         | 4.02E <sup>-17</sup>       | 54.2806                   | 39.7543        | 0.9999         |
| CAU-10-NO <sub>2</sub> | C <sub>2</sub> H <sub>2</sub>       | 2.4088                     | 0.0129                    | 0.9117         | 0.7923                     | 0.3160                    | 1.3193         | 0.9999         |
|                        | CO <sub>2</sub>                     | 3.3706                     | 0.0164                    | 0.9885         | 0.0293                     | 0.0107                    | 8.9960         | 1.0000         |
| CAU-10-NH <sub>2</sub> | C <sub>2</sub> H <sub>2</sub>       | 3.5567                     | 0.1161                    | 1.1926         | 0.1560                     | 0.1202                    | 3.8672         | 0.9999         |
|                        | CO <sub>2</sub>                     | 3.7883                     | 0.0098                    | 0.9381         | 0.2336                     | 0.0361                    | 1.3167         | 1.0000         |
| CAU-10-CH <sub>3</sub> | C <sub>2</sub> H <sub>2</sub>       | 3.4925                     | 0.0245                    | 0.9146         | 1.1375                     | 0.0323                    | 3.3455         | 0.9999         |
|                        | CO <sub>2</sub>                     | 3.2390                     | 0.0052                    | 0.9033         | 0.1384                     | 0.0628                    | 1.7869         | 1.0000         |

**Table S8.** Comparative C<sub>2</sub>H<sub>2</sub> adsorption performance of MOFs at 25 °C and 1 bar with no open metal sites from literature.

| Materials                       | C <sub>2</sub> H <sub>2</sub> uptake (mmol g <sup>-1</sup> ) | CO <sub>2</sub> uptake (mmol g <sup>-1</sup> ) | C <sub>2</sub> H <sub>2</sub> /CO <sub>2</sub> uptake ratio | C <sub>2</sub> H <sub>2</sub> /CO <sub>2</sub> Selectivity | Ref.                                               |
|---------------------------------|--------------------------------------------------------------|------------------------------------------------|-------------------------------------------------------------|------------------------------------------------------------|----------------------------------------------------|
| MIL-160                         | 8.5                                                          | 4                                              | 2.1                                                         | 10                                                         | J. Am. Chem. Soc. 2022, 144, 1681–1689             |
| CAU-23                          | 5.3                                                          | 3.2                                            | 1.6                                                         | 3.8                                                        | J. Am. Chem. Soc. 2022, 144, 1681–1689             |
| MUF-17                          | 3                                                            | 2.5                                            | 1.2                                                         | 6                                                          | Chem. Mater., 2019, 31, 4919–4926                  |
| JCM-1                           | 3.3                                                          | 2.5                                            | 1.3                                                         | 13.6                                                       | Angew. Chem., Int. Ed., 2018, 57, 7869–7873        |
| FJU-90A                         | 8                                                            | 4.5                                            | 1.7                                                         | 4.3                                                        | J. Am. Chem. Soc., 2019, 141, 4130–4136            |
| FJU-36A                         | 2.3                                                          | 1.5                                            | 1.5                                                         | 2.8                                                        | Inorg. Chem., 2018, 57, 12961–12968                |
| ZJNU-13                         | 5.2                                                          | 3.9                                            | 1.3                                                         | 5.6                                                        | ACS Appl. Nano Mater., 2020, 3, 2911–2919          |
| ZJU-195A                        | 9.5                                                          | 4.6                                            | 2                                                           | 4.7                                                        | ACS Sustainable Chem. Eng., 2019, 7, 2134–2140     |
| NBU-8                           | 8.1                                                          | 2.2                                            | 3.6                                                         | 5.4                                                        | Inorg. Chem., 2020, 59, 13005–13008                |
| ZJNU-8                          | 4.1                                                          | 3.7                                            | 1.1                                                         | 4.5                                                        | Eur. J. Inorg. Chem., 2020, 17, 1683–1689          |
| UPC-110                         | 3.2                                                          | 1.1                                            | 2.9                                                         | 5.1                                                        | ACS Sustainable Chem. Eng., 2019, 7, 2134–2140     |
| Co(btzip)(H <sub>2</sub> btzip) | 3.8                                                          | 3.2                                            | 1.1                                                         | 2.45                                                       | ACS Appl. Mater. Interfaces, 2020, 12, 41785–41793 |
| ZJUT-2                          | 3.4                                                          | 2.1                                            | 1.6                                                         | 10                                                         | Chem. Commun., 2019, 55, 11354–11357               |
| CAU-10-H                        | 4                                                            | 2.5                                            | 1.6                                                         | 3.1                                                        | This work                                          |
| CAU-10-OH                       | 1.9                                                          | 1.3                                            | 1.1                                                         | 2.1                                                        | This work                                          |
| CAU-10-F                        | 2.7                                                          | 1.4                                            | 1.9                                                         | 3.2                                                        | This work                                          |
| CAU-10-NO <sub>2</sub>          | 2.1                                                          | 2.1                                            | 1                                                           | 2.1                                                        | This work                                          |
| CAU-10-NH <sub>2</sub>          | 3.5                                                          | 2.1                                            | 1.6                                                         | 8.4                                                        | This work                                          |
| CAU-10-CH <sub>3</sub>          | 3.5                                                          | 1.3                                            | 2.7                                                         | 6.5                                                        | This work                                          |

### Diffusion time constant:

The diffusion time constant is denoted by the ratio  $D$  ( $D_c/r_c^2$ ). From the following micropore diffusion model equation, it can be further derived :

$$\frac{M_T}{M_E} = \frac{6}{r_c} \sqrt{\frac{D_c T}{\pi}}$$

where  $M_E$  represents equilibrium gas uptake. The gas uptake at time  $T$  is denoted by  $M_T$ , the equivalent spherical particle's radius is represented by  $r_c$ , and the inter-crystalline diffusivity of gas molecules in porous media is indicated by  $D_c$ . By multiplying the square of the slope ( $M_T/M_E$  plotted against  $T^{1/2}$ ) by  $\pi/36$ , one can determine  $D$ .

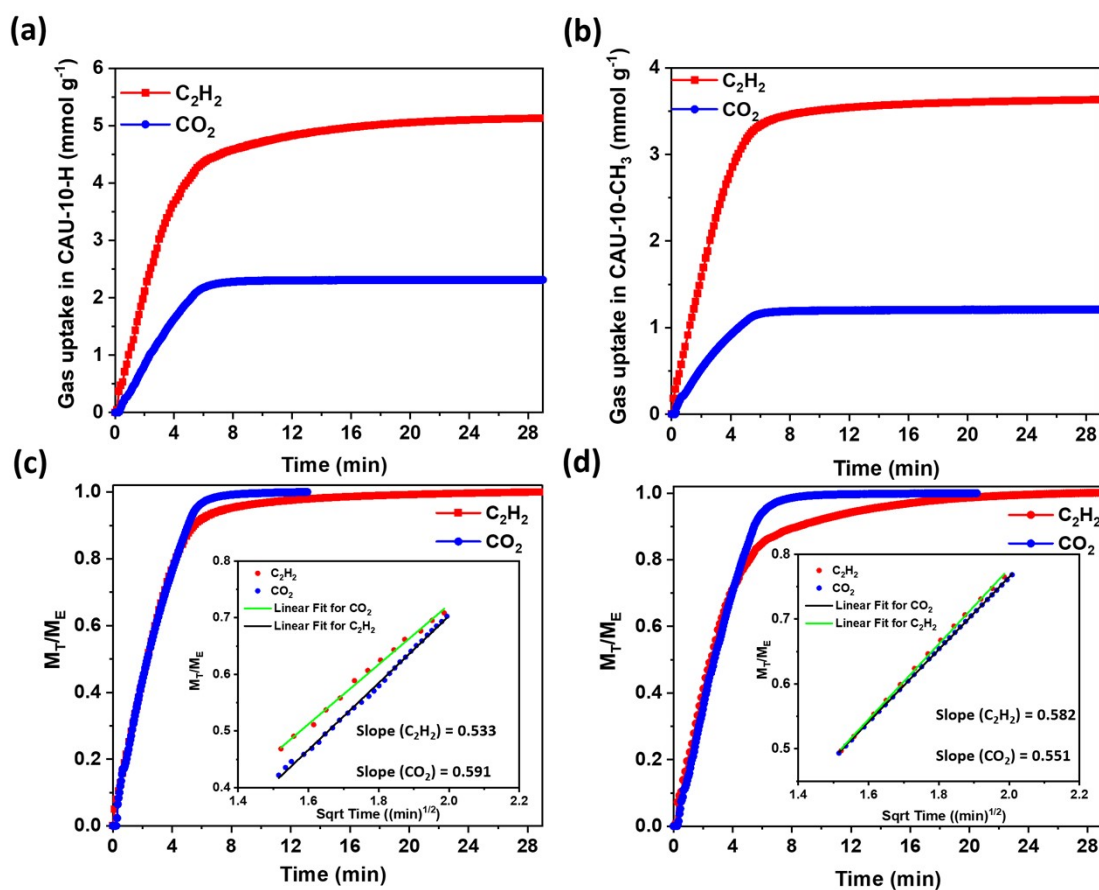

**Fig. S13** Adsorption kinetic diagrams of C<sub>2</sub>H<sub>2</sub> and CO<sub>2</sub> adsorption upto 1 bar at 25 °C on (a) CAU-10-H (b) CAU-10-CH<sub>3</sub>. Normalized scale plots with respect to equilibrium uptake of C<sub>2</sub>H<sub>2</sub> and CO<sub>2</sub> upto 1 bar at 25 °C for (c) CAU-10-H (d). CAU-10-CH<sub>3</sub>. Fitting for time dependent adsorption data for diffusion time constant determination as inset figure in (c) CAU-10-H (d) CAU-10-CH<sub>3</sub>.

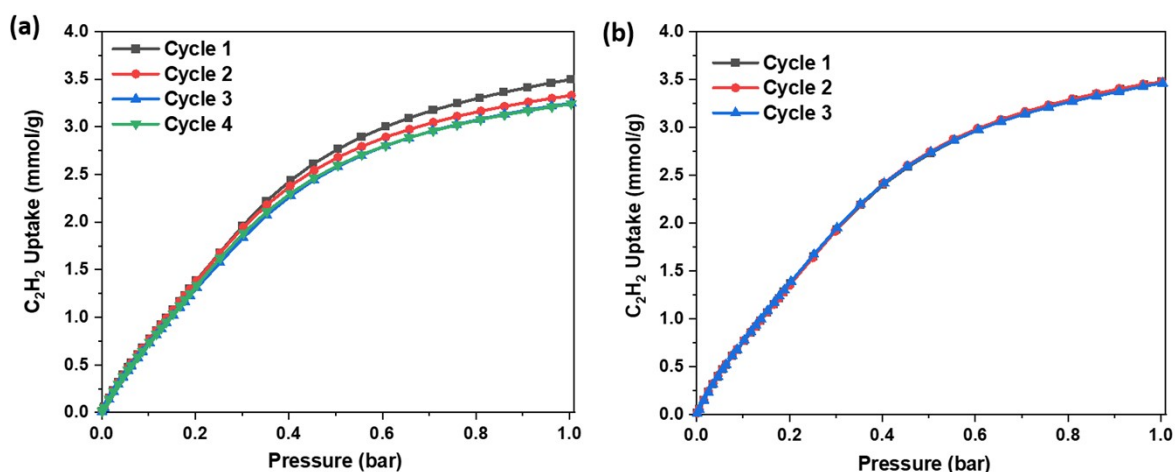

**Fig. S14** (a) Repeated single-gas ( $C_2H_2$ ) adsorption and desorption cycles for CAU-10- $CH_3$  by employing desorption using vacuum ( $5 \times 10^{-4}$  Torr). (b) Repeated single-gas ( $C_2H_2$ ) adsorption and desorption cycles for CAU-10- $CH_3$  by employing desorption under vacuum ( $5 \times 10^{-4}$  Torr) at a temperature of  $200^\circ C$ .

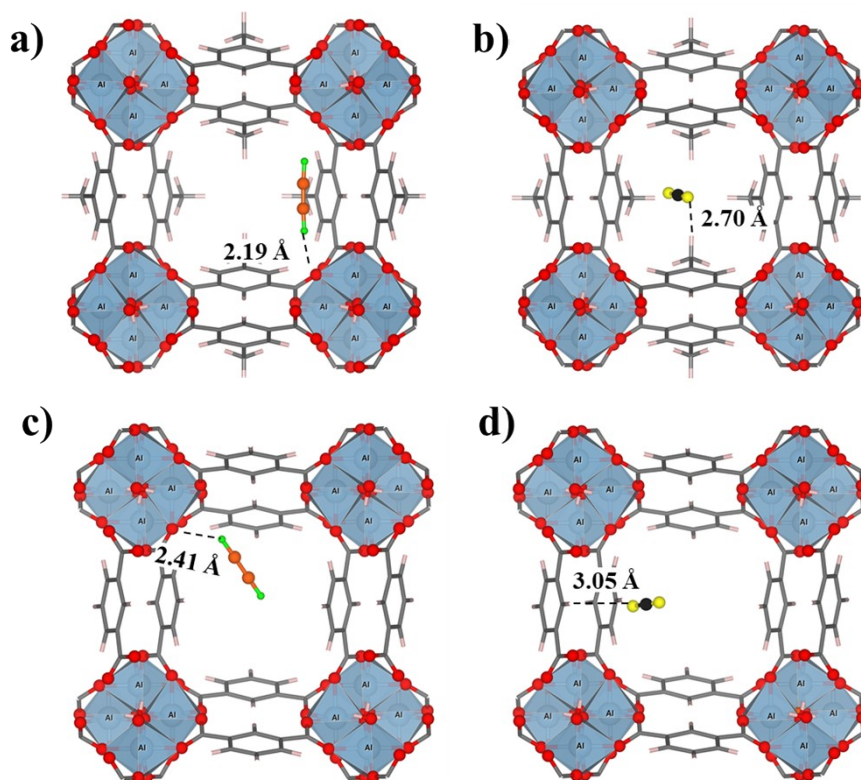

**Fig. S15** DFT-optimized geometries of (a,c)  $C_2H_2$  and (b,d)  $CO_2$  adsorption on CAU-10-H (bottom) and CAU-10- $CH_3$  (top). Color code: blue (Al), red (O), gray (C), white (H), yellow (O of  $CO_2$ ), black (C of  $CO_2$ ), orange (C of  $C_2H_2$ ), and green (H of  $C_2H_2$ ).

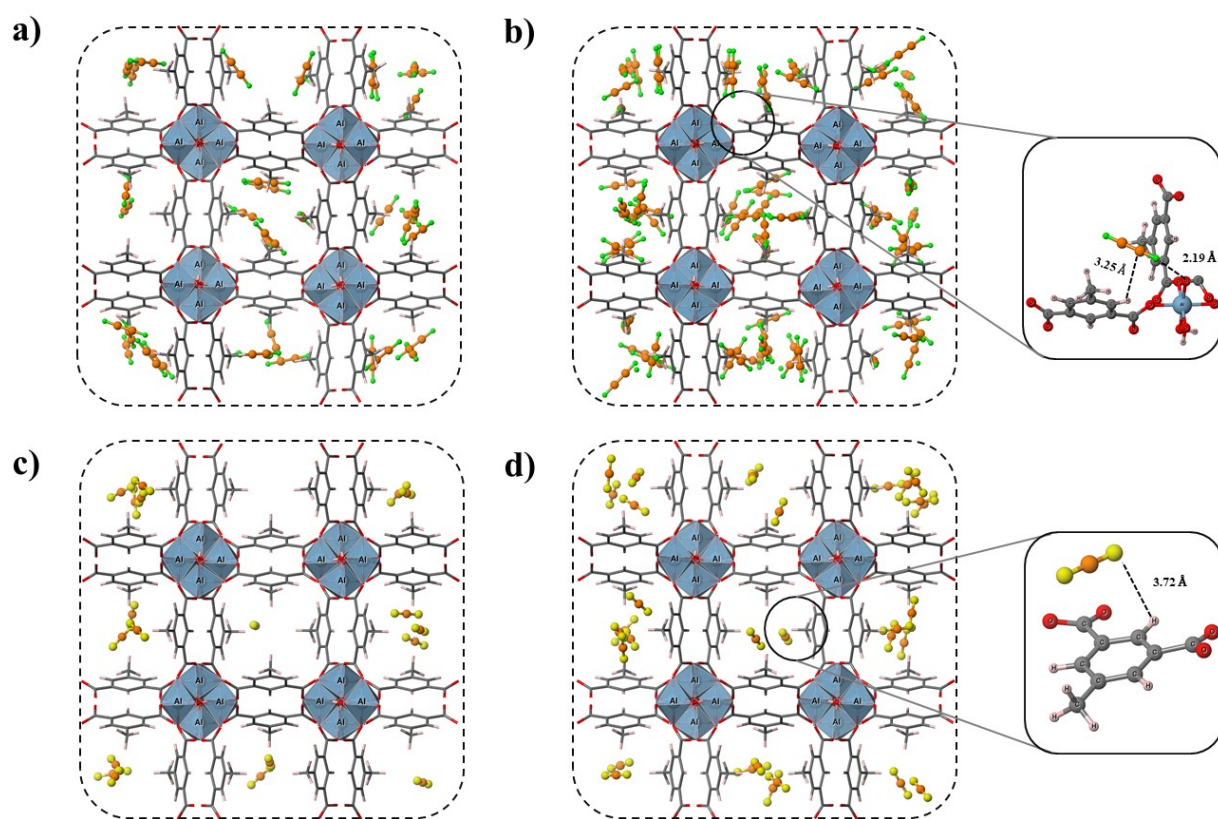

**Fig. S16** (a,b)  $C_2H_2$  and (c,d)  $CO_2$  single component Monte Carlo simulation snapshots of CAU-10- $CH_3$  calculated at 25 °C with 0.2 bar (left) and 1 bar (right). Color code: blue (Al), red (O), gray (C), white (H), yellow (O of  $CO_2$ ), orange (C of  $CO_2$  and  $C_2H_2$ ), and green (H of  $C_2H_2$ ).

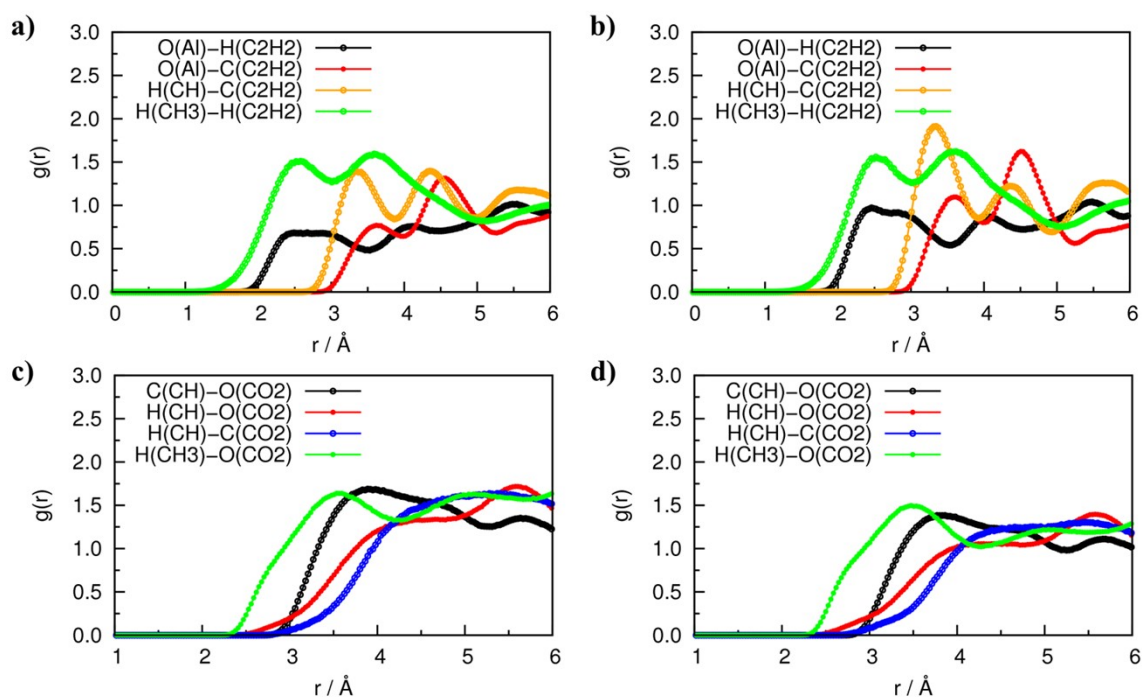

**Fig. S17** (a,b) C<sub>2</sub>H<sub>2</sub> and (c,d) CO<sub>2</sub> Radial distribution functions for representative atom pairs related to CAU-10-CH<sub>3</sub> calculated from the Monte Carlo simulations at 25°C with 0.2 bar (left) and 1 bar (right).

### Force Field validation

We initially selected CAU-10-H as the benchmark MOF framework to validate the selected force field parameters and atomic partial charges to describe the interactions between the two guest molecules and the host framework.

We first use UFF force field to describe the Lennard-Jones parameters for the atoms of the MOF framework, CO<sub>2</sub> was described by the well-established EPM2 model and C<sub>2</sub>H<sub>2</sub> was represented by the model reported by Fisher et al. First, the interaction energy was computed through a MC simulation performed in the NVT ensemble for a single molecule per unit cell at 25°C. These energetic values were compared with the DFT interaction energy and the experimental Q<sub>st</sub>, as illustrated in **Fig. S18**. Notably, both the NVT simulation at 298 K and DFT calculations at 0 K show a reasonable accordance with the experimental Q<sub>st</sub>, indicating that CAU-10-H possesses a higher affinity for C<sub>2</sub>H<sub>2</sub> compared to CO<sub>2</sub>. Specifically, the DFT calculations evidence an interaction energy difference between C<sub>2</sub>H<sub>2</sub> and CO<sub>2</sub> of 6.7 kJ/mol, while the simulated adsorption energy difference is 4.3 kJ/mol and the experimental isosteric enthalpy of adsorption difference is 9.20 kJ/mol.

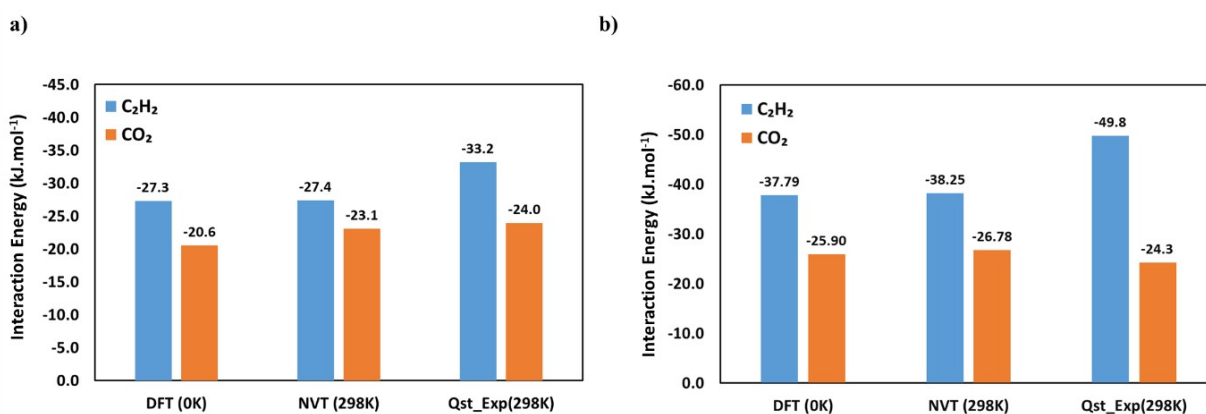

**Fig. S18** Comparative calculated interaction energy of C<sub>2</sub>H<sub>2</sub> and CO<sub>2</sub> on (a) CAU-10-H and (b) CAU-10-CH<sub>3</sub>: DFT and NVT-Monte Carlo (25°C) alongside the experimental Q<sub>st</sub> value at 25 °C.

Subsequently, we computed the single-component C<sub>2</sub>H<sub>2</sub> and CO<sub>2</sub> adsorption isotherms.

Remarkably, there is an excellent agreement observed between the simulated C<sub>2</sub>H<sub>2</sub> adsorption isotherm at 25°C and the corresponding experimental data within the pressure range of 0-1 bar. However, regarding CO<sub>2</sub>, the simulated adsorption isotherm is shown to overestimate the experimental results (**Fig. 6a**). To address this, additional testing was conducted by implementing different set of LJ parameters for the MOF atoms, including a full description of the LJ parameters by the Dreiding force field and a mixed one with Dreiding and UFF LJ parameters (i.e., the organic part is described by Dreiding and inorganic part by UFF). A comparison of the single-component isotherms of CO<sub>2</sub> using these different force fields is delivered in **Fig. S19a**. The analysis revealed that utilizing the mixed strategy UFF/Dreiding leads to a slightly better description of the experimental CO<sub>2</sub> adsorption isotherm than the use of pure UFF. Additionally, a comprehensive comparison of three different CO<sub>2</sub> models was conducted in the case of the LJ parameters of the MOF framework atoms described by UFF. The corresponding results illustrated in **Fig. S19b** indicate that the EPM2 model leads to a better description of the experimental data than the two other tested models.

When we used the same UFF force field to describe the LJ parameters of the CAU-10-CH<sub>3</sub> atoms, we managed to capture reasonably the CO<sub>2</sub> sorption isotherm especially the amount adsorbed at 1 bar as shown in Fig. 6b. This was not the case for C<sub>2</sub>H<sub>2</sub> where only satisfactory agreement was obtained between the experimental and simulated adsorption isotherms at very low-pressure ranges (<0.2 bar- see **Fig. S21a**). At higher loading, the GCMC simulated C<sub>2</sub>H<sub>2</sub> adsorption isotherm substantially deviated from the experimental data (Fig. S20a). We suspected that C<sub>2</sub>H<sub>2</sub> molecules, especially at higher loadings, should approach the MOF framework more closely than the Monte Carlo simulations allow due the structural constraints posed by the bulky functional -CH<sub>3</sub> groups and the rigidity of the MOF framework considered in these calculations. To verify this assumption, AIMD simulations were considered to dynamically assess the distance between the carbon atoms of the functionalized CH<sub>3</sub> group and the adsorbed C<sub>2</sub>H<sub>2</sub> molecules. Specifically, the AIMD simulations were performed for a loading of C<sub>2</sub>H<sub>2</sub> corresponding to the adsorbed amount experimentally obtained at 1 bar (3.5 mmol/g), i.e. about 13 molecules per unit cell. Subsequently, the calculated interaction distances of carbon and hydrogen atoms of the CH<sub>3</sub> group and the C<sub>2</sub>H<sub>2</sub> molecules. were considered to adjust the value of sigma in the force field (**Table S10**), while maintaining the other interactions treated by the set of initial LJ parameters. This fine-tuning strategy aimed to



better capture the spatial constraints and intermolecular interactions specific to the CAU-10-CH<sub>3</sub> structure, thus improving the accuracy of the adsorption predictions, particularly for C<sub>2</sub>H<sub>2</sub> at varying pressures and loadings as shown in **Fig. S21a**.

The validation stage involves a comprehensive comparison between the results obtained from AIMD simulations and those predicted by force field MC simulations. The Radial Distribution Function (RDF) obtained from AIMD simulations, as illustrated in Supplementary **Fig. S20**, served as a reference point. Supplementary **Fig. S21** presents the RDF obtained at 1 bar pressure, alongside a comparative analysis of the single-component isotherm for C<sub>2</sub>H<sub>2</sub> adsorption, both with and without the LJ sigma correction, against the experimental data.

The agreement between the RDF predicted by the force field with the RDF obtained from AIMD simulations at various pressures further validated the accuracy of the refined force field in capturing the C<sub>2</sub>H<sub>2</sub> molecular interactions within the CAU-10-CH<sub>3</sub> structure. C<sub>2</sub>H<sub>2</sub> and CO<sub>2</sub> single component Monte Carlo simulation snapshots and RDF of of CAU-10-H calculated at 25 °C with 0.2 bar and 1 bar are presented as **Fig. S22** and **Fig. S23**.

**Table S9.** Cell parameters of the DFT-optimized CAU-10X (X = -H, -CH<sub>3</sub>)

| Structure              | Loaded molecule               | $a(\text{\AA})$ | $b(\text{\AA})$ | $c(\text{\AA})$ | $\alpha \approx \beta \approx \gamma$ | Volume( $\text{\AA}^3$ ) |
|------------------------|-------------------------------|-----------------|-----------------|-----------------|---------------------------------------|--------------------------|
| CAU-10-H               | C <sub>2</sub> H <sub>2</sub> | 21.49           | 21.49           | 10.18           | 90                                    | 4701.32                  |
|                        | CO <sub>2</sub>               | 21.55           | 21.54           | 9.86            | 90                                    | 4576.89                  |
| CAU-10-CH <sub>3</sub> | C <sub>2</sub> H <sub>2</sub> | 21.61           | 21.59           | 10.20           | 90                                    | 4760.30                  |
|                        | CO <sub>2</sub>               | 21.58           | 21.57           | 10.00           | 90                                    | 4654.80                  |

**Table S10.** LJ Potential Parameters of Host and Guest Molecules

| System                                                                                               | Atom            | $\sigma$ ( $\text{\AA}$ ) | $\epsilon/k_B(K)$ | Q       |
|------------------------------------------------------------------------------------------------------|-----------------|---------------------------|-------------------|---------|
| MOFs                                                                                                 | Al              | 4.0081                    | 0.0000            | Cc      |
|                                                                                                      | C               | 3.4308                    | 52.8389           |         |
|                                                                                                      | H               | 2.5711                    | 22.1420           |         |
|                                                                                                      | H <sub>OH</sub> | 2.5711                    | 0.0000            |         |
|                                                                                                      | O               | 3.1181                    | 30.1937           |         |
| Guest Molecules                                                                                      |                 |                           |                   |         |
| CO <sub>2</sub>                                                                                      | C               | 2.7570                    | 28.1290           | 0.6512  |
|                                                                                                      | O               | 3.0330                    | 80.5070           | -0.3256 |
|                                                                                                      | O               | 3.0330                    | 80.5070           | -0.3256 |
| C <sub>2</sub> H <sub>2</sub>                                                                        | C               | 3.8000                    | 57.8754           | -0.2780 |
|                                                                                                      | C               | 3.8000                    | 57.8754           | -0.2780 |
|                                                                                                      | H <sup>a</sup>  | 0.0000                    | 0.0000            | 0.2780  |
|                                                                                                      | H <sup>a</sup>  | 0.0000                    | 0.0000            | 0.2780  |
| Defined interactions of C <sub>2</sub> H <sub>2</sub> with CH <sub>3</sub> of CAU-10-CH <sub>3</sub> |                 |                           |                   |         |
| C H <sub>3</sub> - C C <sub>2</sub> H <sub>2</sub>                                                   |                 | 3.0154                    | 55.2999           |         |

cc - All studied CAU-10-X structures atomic partial charges were derived from by applying the DDEC (Density Derived Electrostatic and Chemical charges) method using CHARGEMOL module. These charges have been incorporated into the CIF file provided. a - Hydrogen atoms in acetylene were represented as non-interacting atoms.

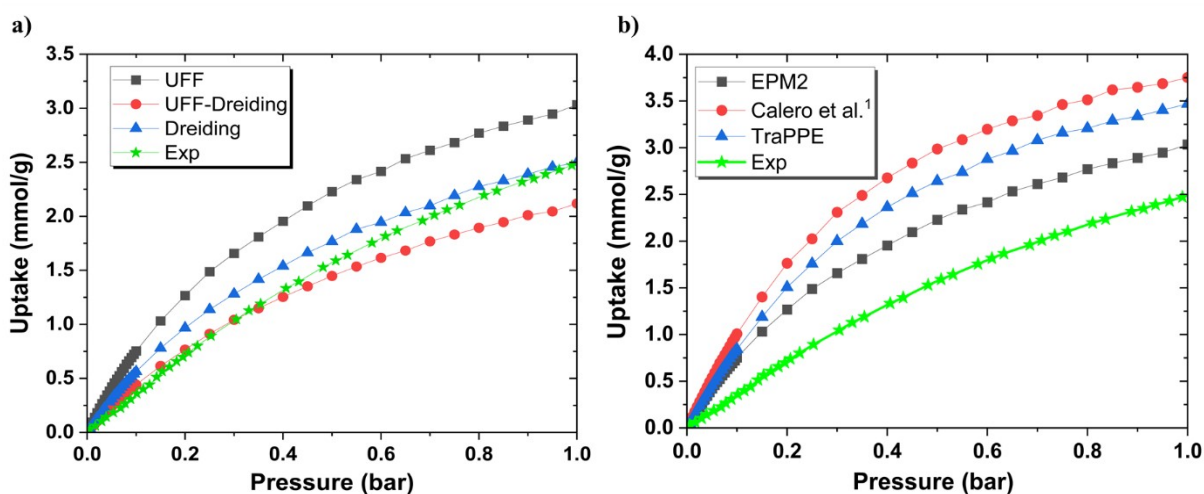

**Fig. S19** GCMC-predicted single component CO<sub>2</sub> adsorption isotherms for CAU-10-H computed using (a) different force fields for the MOF framework with EPM2 model for CO<sub>2</sub> and (b) different CO<sub>2</sub> FF models for the MOF framework treated by UFF in the pressure range 0-1 bar at 25°C.

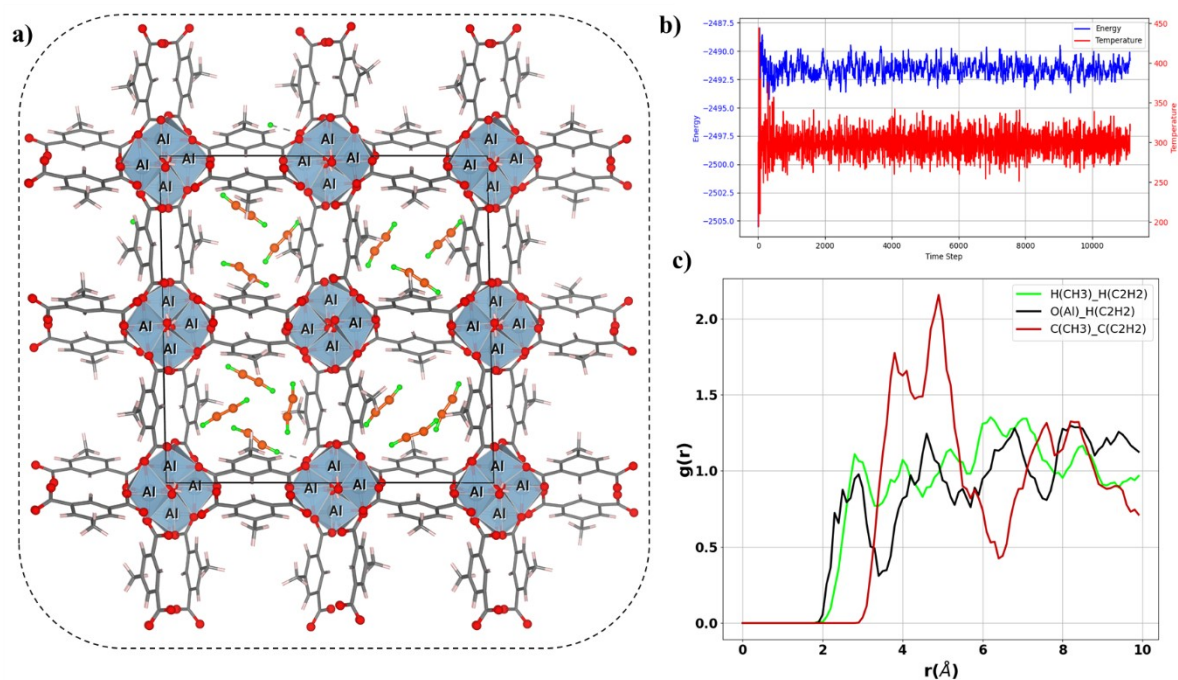

**Fig. S20** AIMD simulations depicting the interaction of C<sub>2</sub>H<sub>2</sub> molecules within CAU-10-CH<sub>3</sub> (a) a representative snapshot captured after 20 ps AIMD simulation run with 13 molecules per unit cell (corresponds to 3.5 mmol/g obtained experimentally at 1 bar), (b) Total energy and temperature variations throughout the 20 ps AIMD trajectory, and (c) RDF analysis for the most representative MOF-C<sub>2</sub>H<sub>2</sub> atom pairs averaged over the 20ps AIMD run.

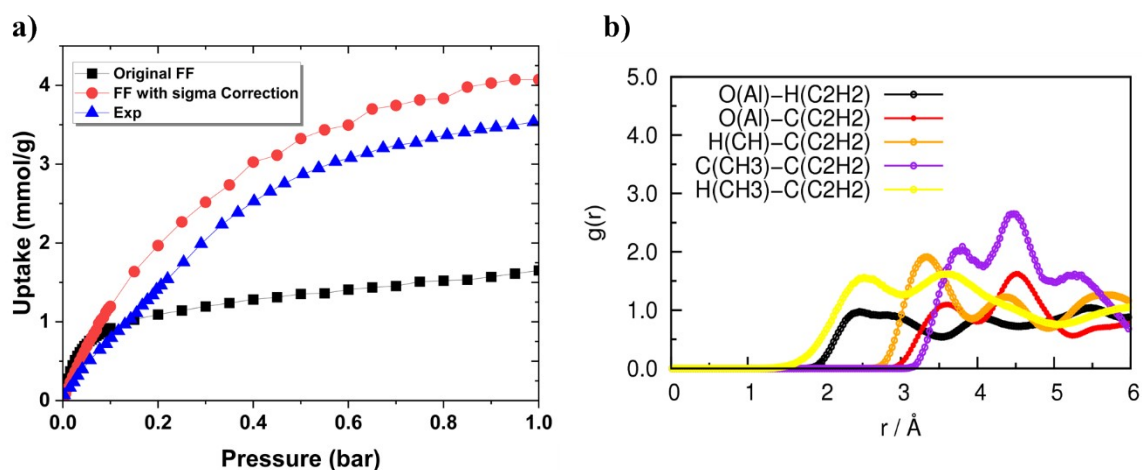

**Fig. S21** (a) Comparison of the GCMC-predicted single component  $C_2H_2$  adsorption isotherm for CAU-10- $CH_3$  with and without sigma correction for the  $C_2H_2$ - $CH_3$  atom pairs alongside the experimental data, and (b) RDF analysis for the most representative MOF- $C_2H_2$  atom pairs obtained at 1 bar for the scenario where sigma correction was applied.

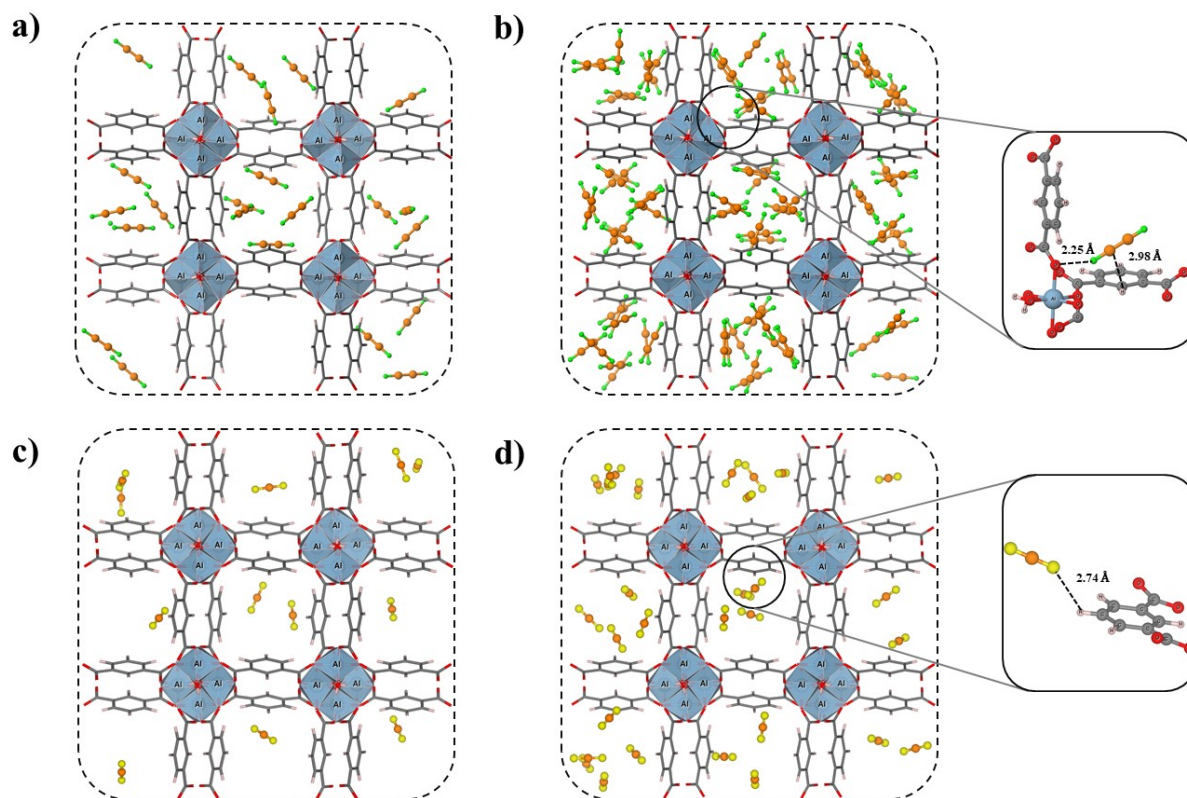

**Fig. S22** (a,b)  $C_2H_2$  and (c,d)  $CO_2$  single component Monte Carlo simulation snapshots of CAU-10-H calculated at  $25^\circ C$  with 0.2 bar (left) and 1 bar (right). Color code: blue (Al), red (O), gray (C), white (H), yellow (O of  $CO_2$ ), orange (C of  $CO_2$  and  $C_2H_2$ ), and green (H of  $C_2H_2$ ).

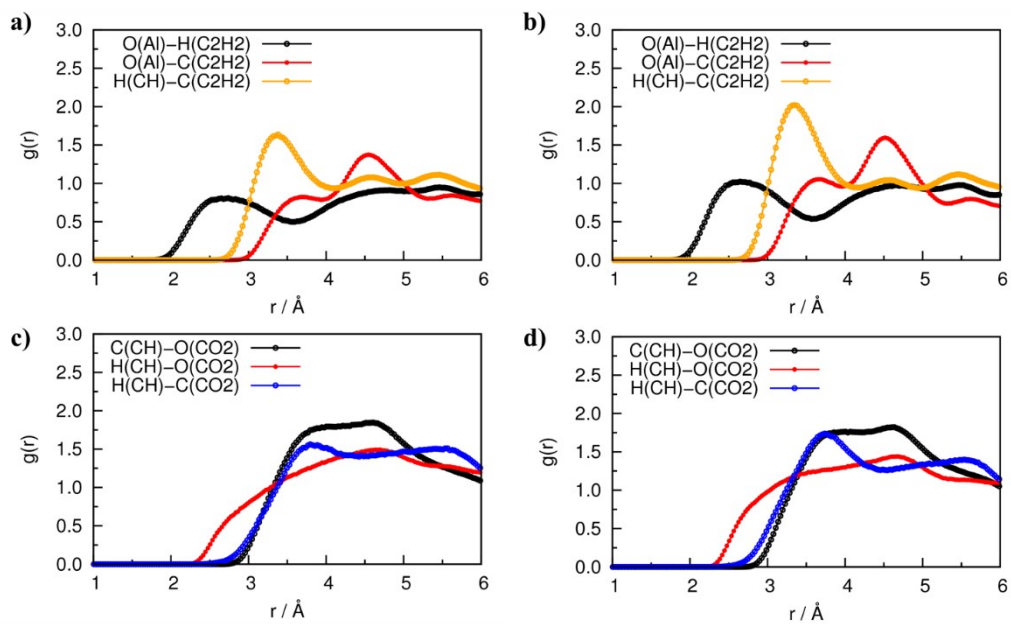

**Fig. S23** (a,b)  $\text{C}_2\text{H}_2$  and (c,d)  $\text{CO}_2$  RDF of CAU-10-H calculated from the MC simulations at 25°C with 0.2 bar (left) and 1 bar (right).

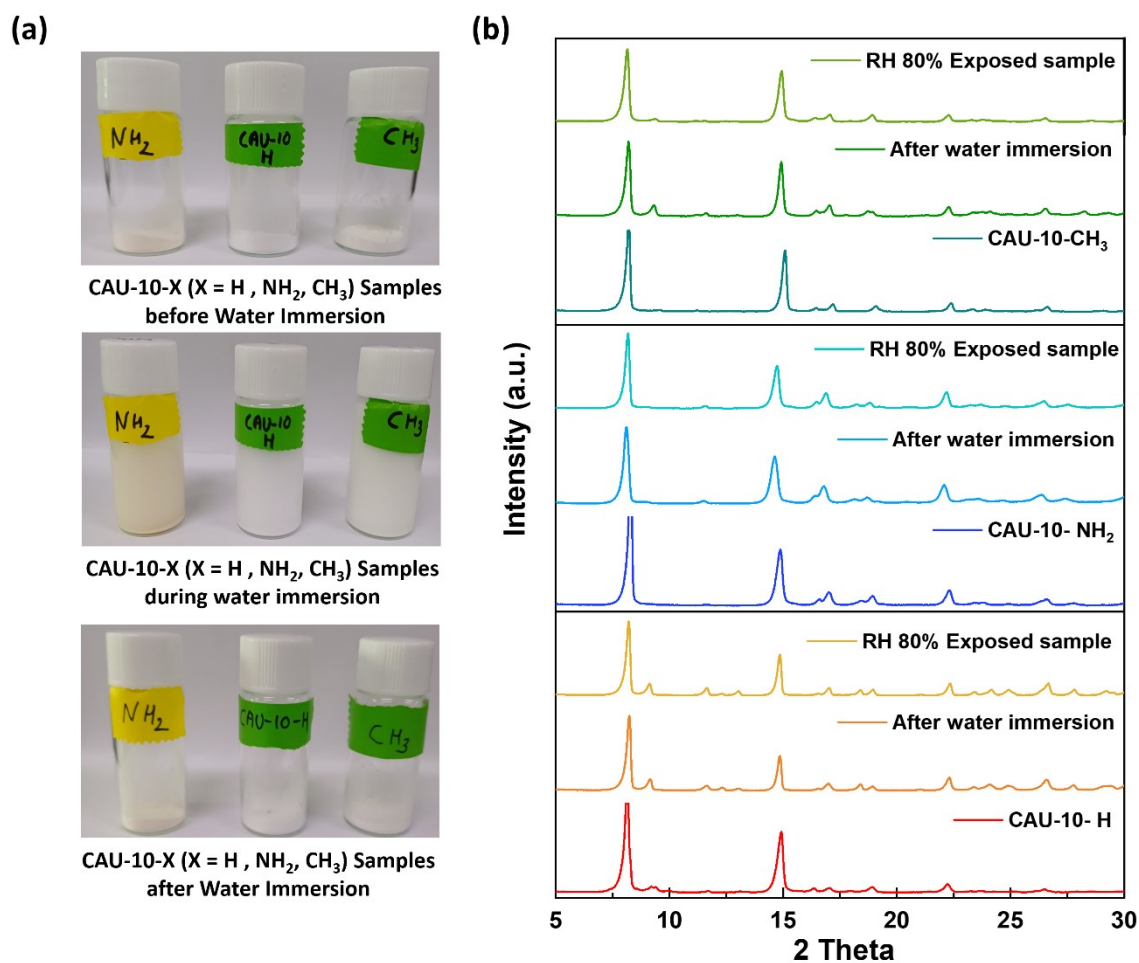

**Fig. S24** (a) Showing CAU-10-NH<sub>2</sub>, CAU-10-H, and CAU-10-CH<sub>3</sub> samples before water immersion, (TOP) under water (middle) and dried sample (below). (b) PXRD comparison of as-synthesized, dried after 72 hour water immersion and after 72 hour exposure to RH-80 for CAU-10-H, CAU-10-NH<sub>2</sub>, and CAU-10-CH<sub>3</sub> samples.

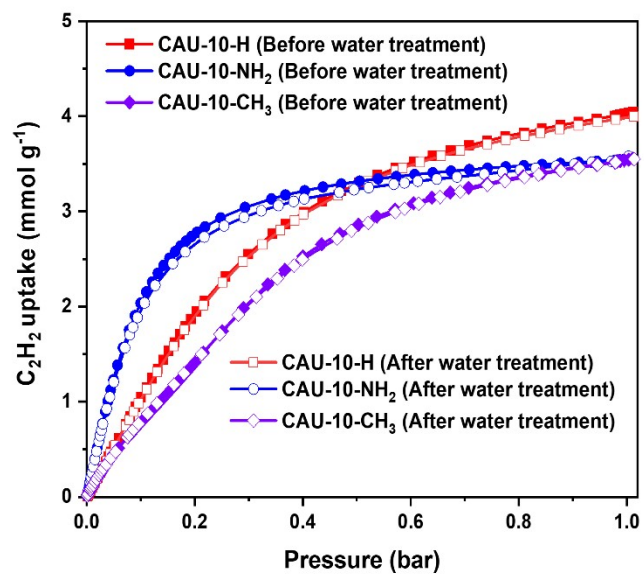

**Fig. S25** Comparison of C<sub>2</sub>H<sub>2</sub> gas adsorption capacity of before and after water treatment (72-hour water immersion) for CAU-10-H, CAU-10-NH<sub>2</sub>, and CAU-10-CH<sub>3</sub> samples.

## Experimental Section

### Synthesis method of CAU-10

#### 1 Synthesis of CAU-10-H

For CAU-10-H synthesis,  $\text{Al}(\text{NO}_3)_3 \cdot 9\text{H}_2\text{O}$  (4.0 g) and isophthalic acid (2.0 g) were dissolved in  $\text{H}_2\text{O}$  (36 ml) and DMF (10 ml), respectively, under stirring. The mixture was placed in a 100 ml Teflon-lined steel autoclave and heated up to 135 °C, and held for 12 h in a convection oven. After it was cooled to room temperature, the obtained solid was dispersed in EtOH and placed in a sonication water bath at 70 °C for 3 h. The mixture was then filtered and washed with EtOH. This purification procedure was repeated two times. Finally, the obtained solid was dried overnight at 100°C under an air condition.

#### 2 Synthesis of CAU-10-OH

CAU-10-OH was synthesized by similar procedures.  $\text{AlCl}_3 \cdot 6\text{H}_2\text{O}$  (4.0 g) and 5-hydroisophthalic acid (3.0 g) were dissolved in  $\text{H}_2\text{O}$  (48 ml) and DMF (12 ml), respectively, under stirring. The mixture was placed in a 100 ml Teflon-lined steel autoclave and heated to 135 °C, and held for 12 h in a convection oven. After being cooled to room temperature, the obtained solid was dispersed in EtOH and sonication in water at 70 °C for 3 h. The mixture was then filtered and washed with EtOH. This procedure was repeated two times. Finally, the obtained solid was dried for 100 °C for 2 h under an air condition.

#### 3 Synthesis of CAU-10-F

$\text{Al}_2(\text{SO}_4)_3 \cdot 18\text{H}_2\text{O}$  (4.0 g) and 5-fluoroisophthalic acid (2.2 g) were dissolved in  $\text{H}_2\text{O}$  (27 ml) and DMF (7 ml), respectively. The mixture was placed in a 100 ml Teflon-lined steel autoclave and kept in an oven at 120 °C for 12 h. After the product was cooled to room temperature, the purification was carried out in the same manner as in the preparation of CAU-10-OH.

#### 4 Synthesis of CAU-10-NO<sub>2</sub>

$\text{AlCl}_3 \cdot 6\text{H}_2\text{O}$  (4.0 g) and 5-nitroisophthalic acid (3.5 g) were dissolved in  $\text{H}_2\text{O}$  (47 ml) and DMF (14 mL), respectively. The mixture was placed in a 100 ml Teflon-lined steel autoclave and kept in an oven at 120 °C for 12 h. After the product was cooled to room temperature, the purification was carried out in the same manner as in the preparation of CAU-10-OH.



## 5 Synthesis of CAU-10-NH<sub>2</sub>

Al(NO<sub>3</sub>)<sub>3</sub>·9H<sub>2</sub>O (4.0 g) and 5-aminoisophthalic acid (3.5 g) were dissolved in H<sub>2</sub>O (47 ml) and DMF (14 mL), respectively. The mixture was placed in a 100 ml Teflon-lined steel autoclave and kept in an oven at 120 °C for 12 h. After the product was cooled to room temperature, the purification was carried out in the same manner as in the preparation of CAU-10-OH.

## 6 Synthesis of CAU-10-CH<sub>3</sub>

AlCl<sub>3</sub>·6H<sub>2</sub>O (4.0 g) and 5-methylisophthalic acid (2.0 g) were dissolved in H<sub>2</sub>O (25 ml) and DMF (7 ml), respectively. The mixture was placed in a 100 ml Teflon-lined steel autoclave and kept in an oven at 120 °C for 12 h. After the product was cooled to room temperature, the purification was carried out in the same manner as in the preparation of CAU-10-OH.

**Table S11.** Synthesis composition for CAU-10(Al)-X

|                        | Metal precursor                                                                | Solvent (H <sub>2</sub> O) | Ligand                               | Solvent (DMF) |
|------------------------|--------------------------------------------------------------------------------|----------------------------|--------------------------------------|---------------|
| CAU-10-H               | Al(NO <sub>3</sub> ) <sub>3</sub> ·9H <sub>2</sub> O<br>(4.0 g)                | 36 ml                      | Isophthalic acid<br>(2.0 g)          | 10 ml         |
| CAU-10-OH              | AlCl <sub>3</sub> ·6H <sub>2</sub> O<br>(4.0 g)                                | 48 ml                      | 5-hydroxyisophthalic acid<br>(3.0 g) | 12 ml         |
| CAU-10-F               | Al <sub>2</sub> (SO <sub>4</sub> ) <sub>3</sub> ·18H <sub>2</sub> O<br>(4.0 g) | 27 ml                      | 5-fluoroisophthalic acid<br>(2.2 g)  | 7 ml          |
| CAU-10-NO <sub>2</sub> | AlCl <sub>3</sub> ·6H <sub>2</sub> O<br>(4.0 g)                                | 47 ml                      | 5-nitroisophthalic acid<br>(3.5 g)   | 14 ml         |
| CAU-10-NH <sub>2</sub> | Al(NO <sub>3</sub> ) <sub>3</sub> ·9H <sub>2</sub> O<br>(4.0 g)                | 25 ml                      | 5-aminoisophthalic acid<br>(2.0 g)   | 7 ml          |
| CAU-10-CH <sub>3</sub> | AlCl <sub>3</sub> ·6H <sub>2</sub> O<br>(4.0 g)                                | 47 ml                      | 5-methylisophthalic acid<br>(3.0 g)  | 14 ml         |
